1     **Competence Inhibition by the XrpA Peptide Encoded Within**  
2                     **the *comX* Gene of *Streptococcus mutans***

3                     Justin Kaspar, Robert C. Shields, and Robert A. Burne\*

4  
5                     Department of Oral Biology, University of Florida, Gainesville, Florida 32610

6  
7  
8  
9     Running title: Antagonism of the ComRS-XIP circuit

10    Keywords: quorum sensing, intercellular signaling, transcription factor, genetic competence,  
11    dental caries

12  
13    \*Corresponding author:

14                    Mailing address: Department of Oral Biology, University of Florida, College of Dentistry,

15                    P.O. Box 100424, Gainesville, FL 32610.

16                    Phone: (352) 273-8850

17                    Fax: (352) 273-8829

18                    E-mail: [rburne@dental.ufl.edu](mailto:rburne@dental.ufl.edu)

19

20 **SUMMARY**

21 *Streptococcus mutans* displays complex regulation of natural genetic competence.  
22 Competence development in *S. mutans* is controlled by a peptide derived from ComS (XIP);  
23 which along with the cytosolic regulator ComR controls the expression of the alternative sigma  
24 factor *comX*, the master regulator of competence development. Recently, a gene embedded  
25 within the coding region of *comX* was discovered and designated *xrpA* (*comX* regulatory peptide  
26 A). XrpA was found to be an antagonist of ComX, but the mechanism was not established. In  
27 this study, we reveal through both genomic and proteomic techniques that XrpA is the first  
28 describe negative regulator of ComRS systems in streptococci. Transcriptomic and promoter  
29 activity assays in the  $\Delta xrpA$  strain revealed an up-regulation of genes controlled by both the  
30 ComR- and ComX-regulons. An *in vivo* protein crosslinking and *in vitro* fluorescent polarization  
31 assays confirmed that the N-terminal region of XrpA were found to be sufficient in inhibiting  
32 ComR-XIP complex binding to ECom-box located within the *comX* promoter. This inhibitory  
33 activity was sufficient for decreases in *PcomX* activity, transformability and ComX accumulation.  
34 XrpA serving as a modulator of ComRS activity ultimately results in changes to subpopulation  
35 behaviors and cell fate during competence activation.

36 **ABBREVIATED SUMMARY**

37 *Streptococcus mutans* displays complex regulation of natural genetic competence,  
38 highlighted by a novel gene, *xrpA*, embedded within the coding region for the master regulator  
39 ComX. We show that XrpA modulates ComRS-dependent activation of *comX* expression,  
40 resulting in changes to sub-population behaviors, including cell lysis. XrpA is the first described  
41 inhibitor of a ComRS system and, because it is unique to *S. mutans* it may be targetable to  
42 prevent diseases caused by this pathogen.

## 43 INTRODUCTION

44 Bacterial biofilm communities coordinate behaviors in response to environmental stimuli  
45 through the use of chemical mediators that accumulate extracellularly to activate transcription of  
46 specific genes when a critical concentration is achieved, in a process termed quorum sensing  
47 (Fuqua *et al.*, 1994). In Gram-negative bacteria, diffusible acylated homoserine lactones are the  
48 principal chemical mediator that act as a proxy for cell density (Papenfort and Bassler, 2016),  
49 whereas small hydrophobic peptides fulfill a similar role in Gram-positive bacteria (Håvarstein *et al.*  
50 *et al.*, 1995). More recently, quorum sensing and gene products involved in intercellular signaling  
51 have been highlighted as an area of interest for therapeutic intervention in some bacterial  
52 infections, because quorum sensing often controls the transcription of genes that contribute to  
53 virulence (Greenberg, 2003).

54 Genetic competence, a transient physiological state in which bacteria produce the gene  
55 products necessary for uptake of DNA from their environment was one of the first described and  
56 studied quorum sensing pathways (Tomasz, 1965). Decades later, genetic competence is still a  
57 valuable model system in molecular microbiology to unravel the complexities of signal  
58 perception, signal transduction and sub-population behaviors, and is of relevance to newer  
59 areas of research that include sociomicrobiology, interspecies antagonism and cooperativity,  
60 and microbial biogeography (Whiteley *et al.*, 2017). Genetic competence has been extensively  
61 studied in the genus *Streptococcus*, including *Streptococcus pneumoniae* (Hui *et al.*, 1995;  
62 Straume *et al.*, 2015), *Streptococcus thermophilus* (Fontaine *et al.*, 2009; Gardan *et al.*, 2013),  
63 *Streptococcus pyogenes* (Mashburn-Warren *et al.*, 2012; Wilkening *et al.*, 2015) and  
64 *Streptococcus mutans* (Li *et al.*, 2001; Son *et al.*, 2012). Interestingly, streptococci harbor two  
65 distinct peptide signaling systems that activate genetic competence: the Mitis and Anginosus  
66 groups utilize an extracellular signaling system composed of a signaling peptide termed CSP  
67 (competence stimulating peptide) and a two-component signal transduction system encoded by  
68 *comDE*. In contrast, the Bovis, Salivarius and Pyogenic streptococci employ an intercellular

69 signaling system that consists of the signal peptide XIP (*comX/sigX* inducing peptide) derived  
70 from the ComS precursor, and a cytosolic Rgg-like regulator designated as ComR (Håvarstein,  
71 2010). While these two signal systems diverge substantially in their distribution among species  
72 and how the systems perceive and transduce their signals, stimulation of either pathway with  
73 the cognate peptide results in the activation of transcription of an alternative sigma factor  
74 termed ComX or SigX. ComX controls the transition into the competent state by activating the  
75 expression of a regulon encoding gene products necessary for DNA uptake and processing.

76         The Mutans group of streptococci, including the human caries pathogen *S. mutans*, are  
77 unique in that most strains encode an apparently functional ComCDE as well as ComRS  
78 pathways. Further, either signal peptide (CSP or XIP) can trigger up-regulation of *comX*,  
79 although different conditions, including pH, redox and growth phase, influence how effectively  
80 each pathway is able to function (Hagen and Son, 2017). Addition of synthetic CSP (sCSP) to  
81 growing cultures of *S. mutans* in a peptide-rich medium, such as BHI, results in activation of  
82 transcription of genes for the biogenesis of bacteriocins via direct binding of phosphorylated  
83 ComE to a conserved sequence in the promoter regions of these genes and operons.  
84 Consistent with this observation, the ComCDE system of *S. mutans* appears to have evolved  
85 from a common ancestor of the BIpCRH system of *S. pneumoniae*, which does not regulate  
86 competence but does induce bacteriocins in the pneumococcus and some related organisms  
87 (Johnston *et al.*, 2014). Transcription of *comX* can also be induced by CSP, but this generally  
88 occurs in only a subset of organisms in a population, it does not involve direct binding of ComE  
89 to the *comX* promoter, and the underlying mechanism for CSP-dependent activation of *comX* is  
90 not well-understood (Kreth *et al.*, 2007; Hung *et al.*, 2011). The proximal regulator for direct  
91 activation of competence is ComRS. When synthetic XIP (sXIP) is added to a peptide-free,  
92 chemically defined medium, such as FMC or CDM, it is imported into the cytosol by the  
93 oligopeptide permease OppA and forms a complex with ComR to activate *comX* transcription in  
94 the entire bacterial population (Mashburn-Warren *et al.*, 2010; Son *et al.*, 2012). The XIP-ComR

95 complex can also activate the gene for the precursor of XIP, *comS*, creating a positive feedback  
96 loop for amplification of the competence activation signal (Fontaine *et al.*, 2013). XIP has been  
97 detected in culture supernates, supporting the hypothesis that XIP is a diffusible intercellular  
98 signal (Desai *et al.*, 2012; Khan *et al.*, 2012; Wenderska *et al.*, 2012), although the mechanism  
99 by which XIP is released into the environment can involve active transport (Chang and Federle,  
100 2016) or cell lysis (Kaspar *et al.*, 2017), depending on the species of bacteria. Recently, it was  
101 confirmed experimentally that XIP is able to act as a diffusible intercellular communication  
102 molecule and that signaling can occur within biofilm populations (Shields and Burne, 2016;  
103 Kaspar *et al.*, 2017).

104 While substantial progress has been made dissecting the mechanisms leading to *com*  
105 gene activation, very little is known about regulation of the system after *comX* is induced and  
106 late competence gene expression is active. In *S. pneumoniae*, shut-off of the ComCDE system  
107 is regulated at multiple levels, including competition between phosphorylated and un-  
108 phosphorylated ComE for binding sites, direct inhibition of activated ComE by the late  
109 competence gene-encoded protein DprA, and by inhibition of ComX activity by an unknown  
110 factor (Martin *et al.*, 2013; Mirouze *et al.*, 2013; Weng *et al.*, 2013). In streptococci that harbor  
111 ComRS systems, the factors that regulate the Com circuit after transcriptional activation have  
112 not been characterized in significant detail. It has been postulated that a “*comZ* gene”, under the  
113 control of ComX, exists that encodes a product that acts on the ComR-XIP complex to create a  
114 feedback inhibition loop (Boutry *et al.*, 2013; Haustenne *et al.*, 2015). Recently, we described a  
115 novel protein encoded within *comX* gene in an alternative (+1) reading frame that we  
116 designated as XrpA (*comX* regulatory protein/peptide A) (Kaspar *et al.*, 2015). We described  
117 XrpA as a novel antagonist of *comX* as loss of XrpA, either by mutating the start codon or by  
118 introducing premature stop codons, led to an increase in transformation efficiency and  
119 accumulation of the ComX protein, whereas overexpression of *xrpA* resulted in decreased  
120 transformability and lower levels of ComX. However, the mechanism by which XrpA exerted its

121 effects was not determined. In this study, we present genetic evidence through transcriptome  
122 profiling and biochemical evidence of protein-protein interactions that demonstrate that XrpA  
123 affects competence development in *S. mutans* by interacting with and inhibiting ComR activity,  
124 thus describing the first negative regulator of competence signaling that acts on the ComRS  
125 circuit.  
126

## 127 RESULTS

### 128 *Transcriptome profiling of an XrpA-deficient strain*

129 In our initial characterization of *xrpA*, we highlighted the unusual transcriptional  
130 characteristics of *xrpA* and the profound influence of XrpA on the dramatically different genetic  
131 competence phenotypes displayed by strains with polar and non-polar mutations in the *rcrR*  
132 gene of the *rcrRPQ* operon, designated  $\Delta rcrR$ -P and  $\Delta rcrR$ -NP, respectively. Inactivation of  
133 *xrpA* in a way that did not alter the primary sequence of ComX could convert the non-  
134 transformable  $\Delta rcrR$ -NP strain into the hyper-transformable state that was observed for the  
135  $\Delta rcrR$ -P strain, with concomitant restoration of ComX production (Kaspar *et al.*, 2015). However,  
136 the *rcrR* mutants displayed extreme and unusual phenotypes, so questions remain as to how  
137 *xrpA* expression is regulated and what role XrpA plays in a wild-type *S. mutans* genetic  
138 background. To begin to answer these questions, we first wanted to compare the  
139 transcriptomes of a  $\Delta xrpA$  strain with that of the *S. mutans* wild-type strain, UA159. For these  
140 studies and those conducted henceforth, the  $\Delta xrpA$  used contains a single base change at the  
141 162<sup>nd</sup> nucleotide of *comX* (*comX*::T162C), which mutates the *xrpA* start codon (ATG→ACT) and  
142 leaves the *comX* protein coding sequence unchanged (Kaspar *et al.*, 2015).

143 Comparison of the transcriptome by RNA-Seq of the wild-type with the mutant lacking  
144 XrpA when cells were grown in the chemically defined medium FMC to mid-exponential phase  
145 revealed 56 differentially expressed genes, with 34 upregulated in  $\Delta xrpA$  and 22 downregulated  
146 **(Figure 1A)**. Many of the upregulated genes were competence-related genes, including *comX*  
147 and genes that are a part of the ComX regulon of *S. mutans* (Khan *et al.*, 2016) **(Table S2)**.  
148 Since loss of *xrpA* caused upregulation of competence genes, we also analyzed the  
149 transcriptome of UA159 treated with 2  $\mu$ M sXIP to induce competence, with UA159 treated with  
150 vehicle (DMSO) as a control. Cells treated with sXIP had 137 genes differentially expressed  
151 compared to the control **(Figure 1B; Table S3)**. Several of the same genes that were the most



152 strongly upregulated in  $\Delta xrpA$ , including the *comF* and *comY* operons, *drpA* and *lytF*, were also  
153 the highest upregulated genes in the sXIP-treated cells. Interestingly, those genes that were  
154 downregulated in the  $\Delta xrpA$  strain differed from those downregulated by sXIP addition to  
155 UA159. All of the downregulated genes in the  $\Delta xrpA$  mutant were located on the TnSMu1  
156 genomic island that encodes predicted transposases, integrases, transporter(s) and  
157 hypothetical proteins (Waterhouse *et al.*, 2007). This genomic island was recently found to be  
158 differentially expressed in *clpP* and *cidB* mutants, providing additional evidence for a link  
159 between XrpA and stress responses (Chattoraj *et al.*, 2010; Kaspar *et al.*, 2015; Ahn and Rice,  
160 2016).

161         Meanwhile, the upregulation of the ComX regulon in the  $\Delta xrpA$  mutant could not be  
162 explained by increases in expression of annotated early competence genes. However, when we  
163 examined the region encoding *comS*, which is encoded in the intergenic region of SMU.61 and  
164 SMU.63c in current database annotations, we found an elevated number of reads for *comS* in  
165 the  $\Delta xrpA$  strain compared to UA159 (**Figure 1C**). When one considers that both *comS* and  
166 *comX* are upregulated in the XrpA-deficient strain, a clearer picture emerges that XrpA most  
167 likely exerts its influence over competence development by influencing the efficiency of ComR-  
168 dependent activation of the *comX* and *comS* promoters, *PcomX* and *PcomS*.

169

#### 170 *XrpA alters comX and comS promoter activity*

171         To determine if XrpA affects the ComR-XIP activated promoters, *PcomX* and *PcomS*, we  
172 incorporated the *xrpA* start codon mutation *comX*::T162C into strains carrying GFP  
173 transcriptional fusions to each promoter. Similarly, we transformed an *xrpA*-overexpressing  
174 strain (184XrpA) into the GFP reporter gene fusion strains to see if increasing the amount of  
175 XrpA produced would yield gene expression patterns that were opposite of those caused by  
176 loss of *xrpA*. Cells were grown in chemically defined CDM, which allows for self-activation of the

177 ComRS system. Indeed, loss of *xrpA* resulted in both earlier and higher level expression of  
178 *PcomX* and *PcomS* reporters, compared to what was observed in the wild-type genetic  
179 background. Conversely, overexpression of *xrpA* from the strong, constitutive promoter on  
180 pIB184 caused a decrease in GFP production from the *comX* and *comS* promoters (**Figure 2**).  
181 Collectively, these results validate the RNA-Seq data and provide support for the hypothesis  
182 that XrpA negatively affects the activation of gene expression by ComR.

183

#### 184 *XrpA influences subpopulation responses to competence signals*

185 Stimulation of genetic competence in a peptide-rich medium, such as brain-heart  
186 infusion (BHI), by CSP results in a bimodal response where only a sub-population of cells  
187 activate *PcomX* (Son *et al.*, 2012). We reasoned that XrpA might influence the proportion of  
188 cells that responded to sCSP in BHI. We utilized both the wild-type and  $\Delta xrpA$  mutant carrying  
189 *PcomX* transcriptional reporter gene fusions and analyzed subpopulation behaviors using flow  
190 cytometry three hours after sCSP addition to planktonic cultures. The percentage of cells that  
191 were GFP-positive was more than 20% greater in the  $\Delta xrpA$  background with addition of 100 nM  
192 sCSP ( $39.7 \pm 2.2$  versus  $61.5 \pm 1.8$ ) (**Figure 3A**) or 1000 nM sCSP ( $48.7 \pm 1.4$  compared to  
193  $73.9 \pm 2.3$ ) (**Figure 3B**). Further, mean GFP fluorescence intensity was increased in the  $\Delta xrpA$   
194 background.

195 Stimulation of the competence cascade by XIP in nanomolar concentrations of wild-type  
196 *S. mutans* growing in a peptide-free medium results in a unimodal population response, but  
197 addition of sXIP to cultures of *S. mutans* at concentrations higher than 1  $\mu$ M can trigger cell  
198 death in a significant fraction of the population (Wenderska *et al.*, 2012). To determine if XrpA  
199 could influence XIP-mediated killing in cells treated with higher concentrations of sXIP, we  
200 followed a protocol similar to the CSP experiments, but stained the cells with propidium iodide  
201 (PI) to measure membrane integrity prior to analysis by flow cytometry. No changes were seen

202 in the proportions of the population that were PI-positive between the wild-type and  $\Delta xrpA$   
203 background, but a clear increase in the mean GFP intensity was observed when *xrpA* was  
204 mutated, similar to what was seen with CSP (**Figure 3C**). However, when the *comS* gene was  
205 removed to eliminate the positive feedback loop in the XIP signaling pathway, a distinct increase  
206 in the proportion of PI-positive cells was seen in the  $\Delta xrpA$  mutant population, compared to  
207 behaviors in the wild-type genetic background ( $36.8 \pm 0.7$  versus  $47.2 \pm 0.9$ ) (**Figure 3D**).  
208 Measurements of eDNA release from overnight cultures were used to confirm the finding that  
209 strains that were activated for competence, but that lack *xrpA*, were more lytic than their wild-  
210 type counterparts (**Figure 3E**). The propensity for enhanced lysis in the absence of XrpA was  
211 also correlated with decreased biofilm formation when either glucose or sucrose was present as  
212 the sole carbohydrate source (**Figure 3F**). Taken together, these data highlight that XrpA can  
213 influence subpopulation behaviors both in terms of competence activation in environments  
214 where peptides are present, and influence lytic behaviors associated with activation of the  
215 competence by high, albeit physiologically relevant, concentrations of signal peptide, with the  
216 enhanced cell death most likely being associated with more robust activation of *PcomX*.

217

#### 218 *Interactions between ComR and XrpA*

219 While genetic data from transcriptome profiling and transcriptional reporter experiments  
220 clearly supported a role for XrpA in interference with the ComRS pathway, we wanted to test  
221 whether these proteins could directly interact. We adapted a Strep-protein interaction (SPINE)  
222 protocol (Herzberg *et al.*, 2007) that allows for crosslinking of proteins *in vivo*, followed by  
223 affinity purification of target protein complexes and identification of interacting partners using  
224 mass spectrometry (MS). For this experiment, we chose ComR as the bait by incorporating a C-  
225 terminal Strep-tag<sup>®</sup> in front of the stop codon. The construct was also engineered in such a way  
226 as to introduce 9 amino acids to serve as a flexible linker sequence to minimize the potential for

227 disrupting the native conformation of ComR; interaction of small hydrophobic peptides by Rgg-  
228 like regulators occurs with the C-terminal domain of the proteins (Talagas *et al.*, 2016). Cultures  
229 (500 ml) of a strain carrying the Strep-tagged ComR expressed from the strong constitutive  
230 promoter on pIB184, and a vector-only control strain, were grown in CDM to mid-exponential  
231 phase ( $OD_{600} = 0.6$ ), at which point either 2  $\mu$ M sXIP or an equivalent volume of 0.1% DMSO  
232 control were added. After growth for an additional hour ( $OD_{600} = 0.8$ ), the homobifunctional *N*-  
233 hydroxysuccinimide ester (DSP) cross-linking agent that is primary amine-reactive and contains a  
234 thiol-cleavable bridge was added to the cells for 45 minutes at 37°C, cells were harvested, and  
235 clarified whole cell lysate were passed over a Strep-Tactin<sup>®</sup> resin for isolation of the targeted  
236 complex, as detailed in the methods section.

237 In our initial experiments, purified protein complexes were subjected to SDS-PAGE,  
238 followed by silver staining (**Supplemental Figure 1**). Five bands of interest that appeared in the  
239 Strep-tagged ComR sample, but not in the vector control sample, were excised from the gel and  
240 identified by mass spectrometry (**Table 2**). Peptide fragments were identified that were derived  
241 from the transcriptional regulator SgaR (SMU.289) and a putative single-stranded DNA binding  
242 protein Ssb2 encoded by SMU.1967, as well as peptides derived from XrpA. In a second  
243 experiment, the purified protein complexes were subjected to two-dimensional differential gel  
244 electrophoresis (2D DIGE) (**Figure 4**). A total of 58 spots of interest were selected and a protein  
245 expression ratio (PER) was calculated between triplicate samples (**Supplemental Table S4**).  
246 Spots chosen for identification were required to have a PER >1.5 compared to the vector-only  
247 control sample in either the sXIP treated or non-treated samples. Peptide fragments were  
248 identified with a high degree of confidence from a putative alcohol-acetaldehyde dehydrogenase  
249 AdhE (SMU.148), a GTP-binding protein TypA (SMU.546), the hypothetical protein encoded by  
250 SMU.1671c and the DNA recombination and repair protein RecA (SMU.2085) (**Table 2**). Ssb2,  
251 which was found in the 1-D gel, was also identified. Work is currently underway to confirm  
252 whether these identified proteins can interact with ComR and the significance of such

253 interaction(s) in the context of the integration of competence development with cellular  
254 physiology and stress responses.

255 Importantly, peptides derived from XrpA were identified from the 2D DIGE and the  
256 fragments detected were derived exclusively from the N-terminus of XrpA (aa 1-38), with the  
257 fragment MFCVSKK being the peptide that was most frequently identified.

258

### 259 *The N-terminal Region of XrpA Can Inhibit Competence Development*

260 The results from the SPINE experiment provided evidence for an interaction between  
261 XrpA and ComR. Based on the fragments identified by MS, we postulated that the N-terminal  
262 domain of XrpA may be inhibitory to the function of ComR. To test this hypothesis, we  
263 synthesized several different peptide fragments of XrpA and evaluated their inhibitory capacities  
264 in various assays (**Table 3**). We first tested the ability of the peptides to interfere with activation  
265 of the *PcomX* transcriptional reporter in cells growing in CDM. Of the four peptides tested that  
266 span the entirety of the 69-aa XrpA, only XrpA-1 containing aa 5-20 of the N-terminal region of  
267 the protein caused a marked decrease in *PcomX* activity, compared to when only vehicle was  
268 added (**Figure 5A**). Interestingly, a higher final OD<sub>600</sub> was also recorded for cultures exposed to  
269 XrpA-1, compared to when either vehicle or any of the other three peptides were tested. To  
270 confirm that this effect was specific for this peptide, a scrambled peptide (same aa composition,  
271 different sequence) was synthesized and tested (**Figure 5B, Table 3**). While some residual  
272 inhibitory activity was evident with the scrambled peptide, compared with control and other  
273 peptides, much of the effect was alleviated. The inhibitory effect of the XrpA-1 peptide was also  
274 found to be dose-dependent in this experimental setup (**Figure 5C**). A similar profile for XrpA-1  
275 was seen using the ComR-XIP activated *PcomS::gfp* transcriptional fusion strain (data not  
276 shown). Notably, one of the most frequently identified peptide fragments of XrpA observed in  
277 the SPINE experiment was not part of the sequence of XrpA-1, so we speculated that using  
278 larger peptides might elicit a stronger inhibitory effect. Peptides N1 and N2 were synthesized

279 that included aa 1-18 and aa 18-38, respectively, encompassing all identified fragments from  
280 the SPINE experiment. Indeed, these two peptides displayed a greater ability to inhibit the  
281 induction of *PcomX* activity in CDM (**Figure 5D**). Similar to the growth profiles of the  
282 transcriptional reporter strains seen in Figure 5A, XrpA-N1 also displayed better growth,  
283 compared to when XrpA-N2 or vehicle was added. Together, these results confirm that the N-  
284 terminal domain of XrpA can inhibit ComRS-dependent activation of *comX* when provided  
285 exogenously to cells growing in a chemically defined medium.

286 We also tested several other competence-related phenotypes with the synthetic XrpA  
287 peptides. In terms of transformation efficiency, a  $107 \pm 13$ -fold decrease was observed when  
288 XrpA-1 was present, compared to the DMSO only control, and  $4 \pm 3$  and  $8 \pm 5$  fold decreases  
289 were observed when XrpA-2 and XrpA-3 were present, respectively (**Figure 6A**). In terms of  
290 ComX accumulation, 20-25% less ComX protein was observed by western blotting in cells  
291 treated with XrpA-1 (**Figure 6B**). A more pronounced loss was seen upon treatment with XrpA-  
292 N1 (30-35%, respectively). It did not appear as if ComR levels were impacted by addition of  
293 either peptide. In fact, more ComR was present by densitometry readings in samples treated  
294 with XrpA-2 or XrpA-3. As the addition of XrpA-1 to growing cultures resulted in higher final  
295  $OD_{600}$  values, we also assessed biofilm formation in the presence of the different XrpA peptides.  
296 A significant decrease in biofilm formation was seen in both glucose- and sucrose-grown  
297 biofilms when XrpA-1 or XrpA-N1 was present, with some decreases, when the other peptides  
298 were added (**Figure 6C**). An explanation for the higher  $OD_{600}$  values when XrpA-1 was present  
299 may be related to reduced cell lysis. eDNA release was measured as described for Figure 3 and  
300 we found significantly less eDNA accumulation in culture supernates from overnight cultures  
301 grown in the presence of XrpA-1, but not with the other XrpA peptides, compared to DMSO-  
302 treated controls. In all, these results support the gene fusion assays and show that the N-  
303 terminal region of XrpA has a significant impact on competence development and biofilm-related  
304 phenotypes when provided exogenously to *S. mutans*.

305

306 *In vitro interactions of XrpA and ComR*

307 To confirm the interaction between the N-terminal region of XrpA and ComR, we utilized  
308 a fluorescence polarization assay where we could monitor the binding of the ComR-XIP  
309 complex to the promoter region of *comX* *in vitro* using purified ComR protein and a 5' Bodipy-  
310 labeled self-annealing stem-loop DNA probe that encompassed the ECom-box to which ComR-  
311 XIP binds for transcriptional activation (Mashburn-Warren *et al.*, 2010; Fontaine *et al.*, 2013).  
312 Strong, direct binding of ComR-XIP was observed to the probe in the absence of any of the  
313 XrpA peptides with a calculated  $K_d$  of  $153 \pm 10$  nM (**Figure 7A, Table 3**). However, when XrpA-  
314 1 was added to the reaction, the  $K_d$  increased to  $651 \pm 99$  nM. Surprisingly, XrpA-2, which had  
315 no observable effects on the phenotypes examined above, also displayed inhibitory effects,  
316 while inclusion of XrpA-3 or XrpA-4 did not substantially alter the calculated  $K_d$  values. A similar  
317 inhibition of ComR-XIP binding was seen when XrpA-N1 or XrpA-N2 peptides were added  
318 individually, with XrpA-N1 having a similar effect to XrpA-1 and XrpA-N2 having a moderate  
319 effect (**Figure 7B**). Two different scrambled peptides, one with the same aa composition as  
320 XrpA-1 (**Figure 7C**) and another with the same composition as XrpA-2 (**Figure 7D**), were also  
321 tested. Similar to the transcriptional reporter assays, the XrpA-1 scrambled peptide showed  
322 some alleviation of inhibitory properties, albeit not as substantial as XrpA-1, whereas inclusion  
323 of the XrpA-2 scrambled peptide yielded a ComR-XIP DNA binding affinity similar to the control.

324 While these results suggest that N-terminal fragments of XrpA are sufficient to diminish  
325 the ability of ComR to bind DNA, the effect could be exerted in multiple ways. For example,  
326 XrpA could interact directly with the ComR-XIP oligomer(s) to decrease the affinity of the  
327 complex for DNA, XrpA could compete with XIP for the SHP (XIP) binding site, or XrpA may  
328 inhibit ComR-dependent activation of gene expression by preventing ComR-XIP from forming  
329 higher-order oligomeric complexes. To begin to explore how XrpA influences ComR behavior,  
330 we synthesized a fluorescein isothiocyanate (FITC)-labeled XrpA-N1 peptide and monitored its



331 binding to ComR by FP in the absence of DNA. Fluorescence polarization in the presence of  
332 XrpA-N1 was increased regardless of whether sXIP was present (**Figure 7E**), indicating that  
333 XrpA may directly interact with ComR and that this interaction can occur even if XIP does not  
334 occupy the SHP-binding pocket. Further, we tested the specificity of XrpA interaction with ComR  
335 by doing fluorescent polarization experiments with two other *S. mutans* purified proteins that do  
336 not participate directly in the regulation of competence, CcpA and SppA (SMU.508) (Abranches  
337 *et al.*, 2008), and neither showed any ability to interact with fluorescent XrpA-N1 (**Supplemental**  
338 **Figure 2**). Finally, we conducted a cold competition fluorescence polarization assay and found  
339 poorer binding for our peptide probe to ComR as increasing concentrations of unlabeled XrpA-  
340 N1 peptide were added (**Figure 7F**). Taken together, these experiments verify that XrpA  
341 interacts directly with ComR, with the outcome being that this interaction antagonizes activation  
342 of gene expression by the ComR-XIP complex and competence development.  
343



## 344 **DISCUSSION**

345           The study of bacterial cell-cell communication has provided valuable insights into  
346 bacterial processes that are critical for growth, essential for the activities of complex microbial  
347 ecosystems, and impactful of human health and diseases. These communication pathways  
348 have served as tractable model systems to dissect the intricacies of specialized secretory  
349 systems for signal molecules and bacteriocins, the mechanisms for signal transduction through  
350 two-component systems and cytosolic transcriptional regulators, the hierarchical control of  
351 regulons, and how multiple sensory inputs are integrated into key physiological outcomes and  
352 manifestation of virulence. As research has continued with these systems, the apparently  
353 straightforward paradigms once described for control of quorum sensing and intercellular  
354 communication have been assimilated into increasingly complex and diverse models for cellular  
355 reprogramming. Examples of such complexity can be found with negative feedback associated  
356 with the late competence gene *dprA* of *Streptococcus pneumoniae* (Weng *et al.*, 2013),  
357 identification of the novel protein Kre that controls the bimodal regulation of ComK in *Bacillus*  
358 *subtilis* (Gamba *et al.*, 2015), and the recent discovery of a short, leaderless, intercellular  
359 peptide signal in Group A *Streptococcus* (Do *et al.*, 2017) that regulates protease expression.  
360 Similar advances in understanding of regulatory systems have been realized using *S. mutans*  
361 as a model organism (Lemos *et al.*, 2013). One important characteristic that distinguishes *S.*  
362 *mutans* from other streptococci is that it encodes the ComRS signaling systems and integrates  
363 the ComCDE bacteriocin production pathway with competence through at least two different  
364 signal peptides XIP and CSP, respectively. Here we demonstrate additional complexities in the  
365 competence pathway of *S. mutans*, which is intimately intertwined with stress tolerance (Kaspar  
366 *et al.*, 2016), by providing experimental evidence that a novel negative feedback system  
367 involving the unusual XrpA peptide is a regulator of the ComRS pathway and, consequently, of  
368 activation of late competence genes and lytic behaviors.

369           Using genetic and biochemical approaches, we confirmed that XrpA serves as a  
370 negative regulator of competence development in *S. mutans* by inhibiting activation of the  
371 targets of the ComR-XIP complex, apparently through a direct interaction with ComR that can  
372 be demonstrated *in vivo* by cross-linking and *in vitro* using purified constituents. We first  
373 described XrpA as an antagonist of ComX (Kaspar *et al.*, 2015) that, based on its unusual  
374 genomic location within the *comX* gene and the inverse relationship of *xrpA*-specific mRNA  
375 abundance to the full-length *comX* transcript and ComX protein levels, might function as an anti-  
376 sigma factor, as opposed to acting on early competence genes (ComDE or ComRS systems).  
377 Instead, using transcriptome profiling and transcriptional reporter assays a picture began to  
378 emerge that XrpA influenced ComRS-dependent activation of the *comX* promoter. XrpA  
379 functioning as an autogenous negative regulator of its own expression by blocking ComR-  
380 dependent activation of *comX* may provide the cells with an opportunity to fine-tune ComS and  
381 ComX production, particularly in response to environmental inputs, such as redox. A similar type  
382 of regulation has been described for the *E. coli* RNA polymerase-binding protein DksA, which  
383 along with the co-factor (p)ppGpp promotes a negative feedback loop on the *dksA* promoter to  
384 keep DksA protein levels constant in different environmental conditions (Chandrangsu *et al.*,  
385 2011). Not only is it intriguing in evolutionary terms that the XrpA negative feedback system  
386 evolved within the *comX* coding region, but also there are potentially important physiological  
387 ramifications of the existence of this regulatory circuit. The exact mechanism by which the *xrpA*  
388 mRNA is translated has not been established, but we presently favor a model by which  
389 ribosomal slippage occurs during *comX* translation at or near the *xrpA* start codon, allowing for  
390 production of XrpA, with the efficiency of translational initiation at the *xrpA* start codon and the  
391 stability of the 5' region of the *comX* mRNA being factors that govern the ratio of ComX to XrpA.  
392 Confirmation of such a model is the subject of ongoing research. Nevertheless, if we accept the  
393 premise that *xrpA* translation is not as efficient as that of *comX* when the *comX* promoter is  
394 activated, then it can be envisioned that the negative feedback loop created by XrpA acting on

395 ComR modulates transcriptional initiation at the *comX* promoter; with the feedback loop  
396 contributing to fine tuning ComX levels in response to cellular physiology and environment  
397 and/or serving as a primary pathway to turn off the competence circuit. The former would be  
398 consistent with the observation that signal perception, induction of *comX* and progression to the  
399 competent state are all exquisitely sensitive to key environmental inputs that include pH (Guo *et*  
400 *al.*, 2014; Son *et al.*, 2015), oxidative stressors (De Furio *et al.*, 2017) and carbohydrate source  
401 and availability (Moye *et al.*, 2016). The latter model would be consistent with the fact that, while  
402 the MecA-Clp pathway can serve as a mechanism to shut off competence through degradation  
403 of ComX, the cells also need a way to shut down the ComRS circuit so as not to produce  
404 nascent ComX during competence while committing to turning off the competence regulon.

405 Our model for XrpA acting at the level of ComR-dependent activation of *comS* and *comX*  
406 is supported by the transcriptional reporter data in which overexpression of *xrpA* lead to  
407 decreased *PcomX* activity (Figure 2). Recently it was suggested that an antagonist termed  
408 “ComZ” must be present within ComRS-positive streptococci that can shut down ComRS  
409 activity in a similar manner to DprA of the ComDE systems (Mirouze *et al.*, 2013; Haustenne *et*  
410 *al.*, 2015). We do not suspect that XrpA is the aforementioned ComZ, as the loss of *xrpA* only  
411 exhibits stronger activation of ComRS-dependent promoters, but does not increase the duration  
412 of activation, as is evident in Figure 2. Studies into ComX stability over the course of  
413 competence activation revealed that ComX protein accumulates faster at early time points after  
414 induction with signal peptides (10-30 minutes) in an *xrpA*-negative strain, consistent with the  
415 data on promoter activity, but ComX protein dissipates at a similar rate in the presence or  
416 absence of *xrpA* (data not shown). Thus, we conclude that XrpA modulates the strength of  
417 ComRS signaling, but other factors must be present, perhaps working in concert with XrpA, to  
418 shut off competence in *S. mutans*, further highlighting the complexity of these systems. Perhaps  
419 other protein candidates identified in our SPINE experiment, such as *ssb2*, fulfill this role; an  
420 area that remains to be investigated.

421 In *S. mutans*, competence activation has been linked to cell lysis in a process similar to  
422 the fratricide that was first described for *S. pneumoniae*. Fratricide appears to be essential for  
423 efficient gene transfer between bacteria in biofilm communities and to be mediated in *S. mutans*  
424 through the activities of encoded cell wall hydrolases that are a part of the ComX regulon (Wei  
425 and Håvarstein, 2012; Khan *et al.*, 2016), and possibly by intracellular bacteriocins (Perry *et al.*,  
426 2009). As seen in Figure 3, the inhibition of ComRS activity by XrpA has the ability to change  
427 the proportion of cells exhibiting responses to signal inputs in a population, both in terms of  
428 competence activation in complex medium and cell lysis, as measured by propidium iodide  
429 staining of XIP-treated cultures and production of eDNA, which in *S. mutans* is heavily  
430 dependent on cell lysis (Liao *et al.*, 2014). We propose a model (**Figure 8**) in which *xrpA*  
431 influences the decision pathway by which cells choose between a) viability and potential to  
432 uptake DNA as a result of competence activation or b) fratricide and cell death, the latter  
433 providing a source of genetic material and eDNA for incorporation into the extracellular matrix  
434 during biofilm formation (Liao *et al.*, 2014). We posit that this decision network relies on the  
435 strength and duration of *PcomX* activation, although we cannot yet rule out the post-  
436 transcriptional regulatory factors (RNA binding proteins, RNAses, or riboswitching) govern the  
437 ratio of XrpA to ComX. Notwithstanding, when XrpA accumulates and/or is active, the strength  
438 of ComRS activation is moderated, providing an even balance between cell viability and cell  
439 death. In the absence of XrpA, ComRS-dependent activation causes ComX over-accumulation,  
440 which favors lytic behavior, which can be observed in Figure 3 and is supported by the fact that  
441 higher concentrations of exogenously supplied XIP induce cell death (Wenderska *et al.*, 2012).  
442 Previously, we reported that overexpression of *xrpA* results in a growth defect in the presence of  
443 oxygen, linking *xrpA* expression and production to oxidative stress tolerance (Kaspar *et al.*,  
444 2015). One aspect not studied here is how *xrpA* might sense an oxidative environment and  
445 integrate that response into competence activation through modulation of ComRS activity. The  
446 C-terminal portion of XrpA, which does not appear to interact with ComR, is very hydrophobic

447 and may be membrane-associate (Kaspar *et al.*, 2015). Additionally, XrpA is unusual in that it  
448 contains seven cysteine residues distributed fairly evenly across the protein that could  
449 participate in disulfide bond formation, between XrpA proteins/peptides to influence XrpA  
450 availability or to form covalent interactions with binding partners. ComR contains three cysteine  
451 residues distributed evenly over its length, which could allow for covalent coupling to XrpA or  
452 sub-fragments of XrpA. It is our working hypothesis that XrpA integrates the oxidative state of  
453 the environment into fine-tuning the strength of the ComRS signal, tempering activation in one  
454 condition over the other. In the case of early biofilm formation, oxygen is readily available and  
455 could be sensed by environmental inputs such as XrpA, leading to its inactivation. In this  
456 scenario, high ComRS activation and ComX accumulation could shift a larger population of the  
457 cells into a lytic mode during competence activation, releasing eDNA to facilitate the formation  
458 of a protective extracellular matrix, thereby conveying increased fitness or persistence of *S.*  
459 *mutans* over other health-associated commensal streptococci. As oxygen levels and redox  
460 potential decrease with biofilm maturation, the need for strong competence activation could be  
461 diminished, shifting the cells into a more stable growth mode with a smaller proportion of cells  
462 undergoing lysis. It is noteworthy also that bacteriocins are among the most highly up-regulated  
463 genes when *S. mutans* is growing in air, compared with the transcriptome of anaerobically  
464 growing cells (Ahn *et al.*, 2007). We are currently exploring these ideas and how the  
465 competence regulon is integrated with biofilm development and its role in competition with  
466 commensal streptococci. It is critical to note that ComX and XrpA are highly conserved in all  
467 sequenced clinical isolates of *S. mutans* (Kaspar *et al.*, 2015), suggesting evolutionary pressure  
468 to keep these pathways intact. Our working hypothesis is this evolutionary pressure arises from  
469 the need to compete with commensal streptococci that can antagonize the growth of *S. mutans*  
470 through a variety of mechanisms (Bowen *et al.*, 2017).

471 We have previously noted that *xrpA* appears to be unique to *S. mutans* (Kaspar *et al.*,  
472 2015). Indeed, a tblastn search for identification of ORFs with similar sequences bacteria

473 showed that only *Streptococcus troglodytae*, a recently sequenced oral isolate from  
474 chimpanzees that is most closely related to *S. mutans* (Okamoto *et al.*, 2013), contains an intact  
475 *xrpA* coding sequence embedded within the *comX* coding region. *Streptococcus dysgalactiae*  
476 subsp. *equisimilis* (SDSE) also contains a similar *xrpA* coding sequence, but the *xrpA* protein  
477 coding sequence is disrupted by premature stop codons in the sequenced isolate of this  
478 streptococcus. Thus, it appears that only *S. mutans* and extremely closely related organisms  
479 are the only ComRS-containing streptococci that encode an XrpA-like inhibitor; there is no  
480 evidence that XrpA is present in *S. rattus*, *S. sobrinus*, *S. cricetus*, *S. downeii* or other mutans  
481 streptococci. We cannot, however, exclude that there are proteins or peptides in ComRS-  
482 containing streptococci that play a role that is similar or identical to that of XrpA in *S. mutans*.  
483 The unique nature of XrpA in *S. mutans* is also notable in the context that the *S. mutans* ComR  
484 has strict recognition for its cognate XIP peptide (Shanker *et al.*, 2016), whereas ComR proteins  
485 from Bovis and Pyogenic streptococci are more promiscuous in the XIP peptides that they are  
486 able to recognize to enhance ComR DNA binding capacity. It is then a logical conclusion that  
487 the Mutans group has further separated from the Bovis and Pyogenic group in terms of ComR-  
488 XIP regulation. A logical extrapolation of these observations is to ask whether XrpA could serve  
489 as a novel anti-carries target or therapeutic. It is important to note that other oral health-  
490 associated commensal streptococci, such as *Streptococcus mitis*, *Streptococcus gordonii* and  
491 *Streptococcus sanguinis* are all part of the Mitis group of streptococci that lack ComRS signaling  
492 systems and rely on ComDE for competence activation (Håvarstein, 2010), so targeting XrpA  
493 should not disrupt a healthy oral biofilm. It is encouraging that small synthesized portions of  
494 XrpA have an effect on competence activation, as shown in Figure 6. It is critical to point out  
495 that while these synthesized peptides were provided exogenously in this study, we do not  
496 suspect at this time that XrpA is actively released to the extracellular environment. As previously  
497 discussed, our current working hypothesis is that XrpA is able to accumulate in response to  
498 external environmental cues, such as oxidative stress, and function as a sensor inside the cells,

499 and at this time have no reason to believe that XrpA has an extracellular lifecycle. Our working  
500 model must also account for the fact that XrpA fragments can elicit effects when provided  
501 exogenously. Therefore, we are testing the hypothesis that XrpA peptides, which may be  
502 released into the extracellular space through lysis, can be actively internalized, perhaps after  
503 processing, to elicit their effects on ComR – similar to what has been proposed for XIP (Kaspar  
504 *et al.*, 2017). Mass spectrometry studies are currently ongoing to localize XrpA and other *S.*  
505 *mutans* encoded peptides that affect competence (Ahn *et al.*, 2014).

506 In summary, this work provide additional novel insights into the complex regulatory  
507 nature of bacterial cell-cell signaling systems, providing the organisms with multiple check  
508 points throughout the circuit to either amplify or diminish the response to signal inputs based on  
509 key environmental and/or physiologic cues. Future work will be focused on how environmental  
510 inputs can influence XrpA/ComR interaction and activities, and the resulting consequences in  
511 terms of biofilm ecology. Development of these model systems should shed further light on  
512 microbial interactions and the importance of cell-cell signaling systems at the very earliest  
513 stages of colonization and biofilm development. It is also interesting to ponder if the recently  
514 discovered peptides such as XrpA, the *rcrQ*-associated peptides of *S. mutans* (Ahn *et al.*, 2014)  
515 and the leaderless SHP of GAS (Do *et al.*, 2017) play important roles in the virulence potential  
516 of these organisms if multiple other peptides with profound impacts on cellular behaviors are  
517 currently hidden in the genomes of Gram-positive bacteria.

518



## 519 **EXPERIMENTAL PROCEDURES**

### 520 *Bacterial Strains and Growth Conditions.*

521 *S. mutans* wild-type strain UA159 and its derivatives (**Table 1**) were grown in either brain heart  
522 infusion (BHI - Difco), FMC (Terleckyj *et al.*, 1975; Terleckyj and Shockman, 1975) or CDM  
523 (Chang *et al.*, 2011) medium. The medium was supplemented with 10  $\mu\text{g ml}^{-1}$  erythromycin, 1  
524  $\text{mg ml}^{-1}$  of kanamycin or 1  $\text{mg ml}^{-1}$  spectinomycin when needed. Unless otherwise noted,  
525 cultures were grown overnight in BHI medium with the appropriate antibiotics at 37°C in a 5%  
526 CO<sub>2</sub> aerobic atmosphere. The next day, cultures were harvested by centrifugation, washed  
527 twice in 1 mL of phosphate-buffered saline (PBS), and resuspended in PBS to remove all traces  
528 of BHI. Cells were then diluted in the desired medium before beginning each experiment.  
529 Synthetic XIP (sXIP, aa sequence = GLDWWSL), corresponding to residues 11-17 of ComS,  
530 was synthesized and purified to 96% homogeneity by NeoBioSci (Cambridge, MA). The  
531 lyophilized sXIP was reconstituted with 99.7% dimethyl sulfoxide (DMSO) to a final  
532 concentration of 2 mM and stored in 100  $\mu\text{L}$  aliquots at -20°C. Selected XrpA peptide  
533 sequences and fluorescently-labeled derivatives were synthesized, purified and confirmed by  
534 mass spectrometry by Biomatik USA (Wilmington, DE). XrpA peptides were also reconstituted  
535 with DMSO to a final concentration of 1 mM and stored at -20°C.

536

### 537 *Construction of Bacterial Strains.*

538 Mutant strains of *S. mutans*, including inactivation of the *xrpA* start codon ( $\Delta xrpA$ ) were created  
539 using a PCR ligation mutagenesis approach as previously described (Lau *et al.*, 2002; Kaspar *et*  
540 *al.*, 2015). Overexpression of genes (*xrpA*, *comR*) was achieved by amplifying the structural  
541 genes of interest from *S. mutans* UA159 and cloning into the expression plasmid pIB184 using  
542 the EcoRI and BamHI restriction sites (Biswas *et al.*, 2008). For *in vivo* protein-protein  
543 interaction experiments, a Strep-tag sequencing (WSHPQFEK) was first inserted in front of the  
544 stop codon on the pIB184-ComR overexpressing plasmid using the Q5® Site Directed



545 Mutagenesis Kit (New England Biolabs, Beverly, Mass.) and following the provided protocol.  
546 After selection of the appropriate construct by sequencing, a [G4S]<sub>2</sub> Linker sequence  
547 (ggtaggaggagctctggtggaggcggtagc) was then inserted between the *comR* and Strep-tag  
548 sequence using the same kit and protocol. Transformants were confirmed by PCR and  
549 sequencing after selection on BHI agar with appropriate antibiotics. Plasmid DNA was isolated  
550 from *E. coli* using QIAGEN (Chatsworth, Calif.) miniprep columns, and restriction and DNA-  
551 modifying enzymes were obtained from New England Biolabs. PCRs were carried out with 100  
552 ng of chromosomal DNA by using *Taq* DNA polymerase, and PCR products were purified with  
553 the QIAquick kit (QIAGEN).

554

#### 555 *Transcriptome Profiling via RNA-Seq.*

556 Selected strains of *S. mutans* to be analyzed by RNA-sequencing (UA159,  $\Delta xrpA$ ) were grown  
557 in FMC medium to mid-exponential log phase of OD<sub>600</sub> = 0.5 before harvesting. For *S. mutans*  
558 UA159 treated with 2  $\mu$ M sXIP, sXIP was added at OD<sub>600</sub> = 0.2. RNA extraction, rRNA removal,  
559 library construction and read analysis was conducted as previously described elsewhere (Zeng  
560 *et al.*, 2013; Kaspar *et al.*, 2015). Briefly, 10  $\mu$ g of high-quality total RNA was processed using  
561 the MICROBExpress™ Bacterial mRNA Enrichment Kit (Ambion of Life Technologies, Grand  
562 Island, NY), twice, before ethanol precipitation and resuspension in 25  $\mu$ L of nuclease-free  
563 water. The quality of enriched mRNA samples was analyzed using an Agilent Bioanalyzer  
564 (Agilent Technologies, Santa Clara, CA). cDNA libraries were generated from the enriched  
565 mRNA samples using the TruSeq Illumina kit (Illumina, San Diego, CA), following instructions  
566 from the supplier. Deep sequencing was performed at the University of Florida ICBR facilities  
567 (Gainesville, FL). Approximately 20 million short-reads were obtained for each sample. After  
568 removing adapter sequences from each short-read and trimming of the 3'-ends by quality  
569 scores (Schmieder and Edwards, 2011), the resulting sequences were mapped onto the

570 reference genome of strain UA159 (GenBank accession no. AE014133) using the short-read  
571 aligner. Mapped short-read alignments were then converted into readable formats using  
572 SAMTOOLS (Li *et al.*, 2009). For viewing of the mapped reads aligned to the genome, .bam  
573 files were uploaded into the Integrative Genomics Viewer (IGV – version 2.3.55) (Robinson *et*  
574 *al.*, 2011). A “.csv” file containing raw read counts for each replicate (3) was then uploaded to  
575 Degust (<http://degust.erc.monash.edu/>) and edgeR analysis performed to determine Log2 fold  
576 change and a false discovery rate (FDR). The P-value was obtained by taking the  $-\log_{10}$  of the  
577 FDR. The data files used in this study are available from NCBI-GEO (Gene Expression  
578 Omnibus) under accession no. GSE110167.

579

#### 580 *Measurements of Promoter Activity via GFP Fluorescence.*

581 For measurements of GFP fluorescence, cultures were inoculated from washed overnight  
582 cultures in CDM medium at a 1:50 dilution. Inoculated medium (175  $\mu$ L) was added to each well  
583 along with a 50  $\mu$ L mineral oil overlay in a Costar™ 96 well assay plate (black plate with clear  
584 bottom; Corning Incorporated) and incubated at 37°C. At intervals of 30 minutes for a total of 18  
585 hours, OD<sub>600</sub> along with GFP fluorescence (excitation 485/20 nm, emission 528/20 nm) was  
586 measured with a Synergy 2 multimode microplate reader (BioTek). Relative expression was  
587 calculated by subtracting the background fluorescence of UA159 (mean from six replicates)  
588 from raw fluorescence units of the reporter strains and then dividing by OD<sub>600</sub>.

589

#### 590 *Flow cytometry.*

591 Bacterial cultures were grown to OD<sub>600</sub> = 0.6 before being harvested, washed and resuspended  
592 in PBS before being run through a FACSCalibur™ (BD Biosciences) flow cytometer. For sCSP  
593 experiments, cultures were grown in BHI after a 1:20 dilution from overnight culture while  
594 cultures were grown in FMC for sXIP experiments at the same initial dilution. Both peptides  
595 were added to the growing cultures at OD<sub>600</sub> = 0.2. sXIP treated cells were stained with 5  $\mu$ g

596 mL<sup>-1</sup> propidium iodide (PI) for 10 minutes in the dark for analysis of membrane-compromised  
597 cells. Cells were then sonicated in a water bath sonicator for 3 intervals of 30 seconds in 5 mL  
598 polystyrene round-bottom tubes to achieve primarily single cells for analysis. Forward and side  
599 scatter signals were set stringently to allow sorting of single cells. In total,  $5 \times 10^4$  cells were  
600 counted from each event, at a maximum rate of  $2 \times 10^3$  cells per second, and each experiment  
601 was performed in triplicate. Detection of GFP fluorescence was through a 530 nm ( $\pm 30$  nm)  
602 bandpass filter, and PI was detected using a 670-nm long pass filter. Data were acquired for  
603 unstained cells and single-color positive controls so that data collection parameters could be  
604 properly set. The data were collected using Cell Quest Pro (BD Biosciences) and analyzed with  
605 FCS Express 4 (De Novo Software). Gating for quadrant analysis was selected by using a dot  
606 density plot with forward and side scatter, with gates set to capture the densest section of the  
607 plot. Graphing and statistical analyses were performed using Prism (GraphPad Software). x-  
608 and y-axis data represent logarithmic scales of fluorescent intensity (arbitrary units).

609

#### 610 *Measurements of eDNA Release.*

611 Overnight cultures of selected *S. mutans* strains, grown in CDM medium with addition of a final  
612 concentration of 10  $\mu$ M of synthetic XrpA peptides when noted, were measured for a final  
613 OD<sub>600</sub> and then harvested by centrifugation for their supernatant fraction. 5 mL of the resulting  
614 supernatant was then run through QIAGEN (Chatsworth, Calif.) PCR purification columns to  
615 capture eDNA present. The eDNA was then eluted off the column with 600  $\mu$ L water, and 594  
616  $\mu$ L of this elution was mixed with 5  $\mu$ L of 50  $\mu$ M Sytox Green (Invitrogen) to a final concentration  
617 of 0.5  $\mu$ M. After vortexing the solution and incubation for 15 minutes in the dark at room  
618 temperature, 200  $\mu$ L of the stained samples were transferred into a Costar™ 96 well assay plate  
619 (black plate with clear bottom; Corning Incorporated). Fluorescence (excitation 485/20 nm,  
620 emission 528/20 nm) was measured with a Synergy 2 multimode microplate reader (BioTek)  
621 and the resulting data was then normalized for the measured final OD<sub>600</sub> nm resulting in a final

622 arbitrary eDNA release measurement. The data represents 3 independent biological replicates  
623 with 3 technical replicates each. Statistical significance was determined by the Student's T-Test.

624

#### 625 *Biofilm Assays.*

626 Selected *S. mutans* strains were grown from overnight cultures to mid-exponential phase after a  
627 1:20 dilution in BHI broth at 37°C in a 5% CO<sub>2</sub> atmosphere. The mid-exponential phase cells  
628 were then diluted 1:100 into CDM medium with either 20 mM glucose or CDM medium  
629 containing 15 mM glucose and 2.5 mM sucrose as a carbohydrate source. 200 µL of this dilution  
630 was loaded into 96 well polystyrene microtiter plates and incubated in a 5% CO<sub>2</sub> atmosphere at  
631 37°C for 48 h. A final concentration of 10 µM of synthetic XrpA peptides were added when  
632 needed. After, the medium was decanted, and the plates were washed twice with 200 µL of  
633 sterile water to remove planktonic and loosely bound cells. The adherent bacteria were stained  
634 with 60 µL of 0.1% crystal violet for 15 min. After rinsing twice with 200 µL of water, the bound  
635 dye was extracted from the stained biofilm using 200 µL of ethanol:acetone (8:2) solution, twice.  
636 The extracted dye was diluted into 1.6 mL of ethanol:acetone solution. Biofilm formation was  
637 quantified by measuring the absorbance of the solution at OD<sub>575</sub> nm. The data represents 3  
638 independent biological replicates with 4 technical replicates each. Statistical significance was  
639 determined by the Student's T-Test.

640

#### 641 *SPINE for ComR Interactions.*

642 A Strep-tag protein interaction experiment (SPINE) was derived from a previously published  
643 protocol (Herzberg *et al.*, 2007). Briefly, a strain harboring a C-terminal Strep-tagged ComR,  
644 along with the vector only control, was grown in 500 mL of CDM medium after a 1:20 dilution  
645 from overnight cultures to an OD<sub>600</sub> = 0.6. At this time, either 2 µM of sXIP or DMSO (vehicle,  
646 0.1% final concentration) was added to cultures and were grown an additional hour at 37°C in a  
647 5% CO<sub>2</sub> atmosphere. After, cells were pelleted by centrifugation, washed and resuspended in 50

648 mM HEPES (pH 8) with a final concentration of 2.5 mM of protein crosslinker solution added  
649 (DSP, Thermo Scientific). The cells were incubated at 37°C for 45 minutes, at which point 50  
650 mM Tris (pH 7.5) was added to stop the crosslinking reaction. After, cells were pelleted, washed  
651 in Buffer W, and lysed via bead beating in Buffer W. The crosslinked Strep-tagged ComR  
652 complex was then purified from the lysate using Strep-tactin® resin (iba) in a chromatography  
653 column following the manufacture's protocol. Purification was verified by running the selected  
654 fractions and elutions on 16.5% Tris-Tricine gels (BioRad) followed by silver staining and/or  
655 western blot (**Supplemental Figure 3**). Protein concentrations of the elutions were determined  
656 using the bicinchoninic acid assay (BCA; Thermo Scientific). Complex-containing elutions were  
657 then combined and precipitated by the TCA/Acetone precipitation method. Precipitant was sent  
658 to Applied Biomics (Hayward, CA) for 2D DIGE Protein Expression Profiling which included 2D  
659 gel electrophoresis, determination of protein expression ratios between samples, spot picking  
660 and identification by LC-MS/MS.

661

#### 662 *Transformation Assays.*

663 Overnight cultures were diluted 1:20 in 200 µL of FMC medium in polystyrene microtiter plates  
664 in the presence or absence of 10 µM of synthetic XrpA peptides. The cells were grown to  $OD_{600}$   
665 = 0.15 in a 5% CO<sub>2</sub> atmosphere. When desired, 0.5 µM of sXIP was added, cells were  
666 incubated for 10 min and 0.5 µg of purified plasmid pIB184, which harbors a erythromycin  
667 resistance (Erm<sup>R</sup>) gene, was added to the culture. After 2.5 h incubation at 37°C, transformants  
668 and total CFU were enumerated by plating appropriate dilutions on BHI agar plates with and  
669 without the addition of 1 mg mL<sup>-1</sup> erythromycin, respectively. CFU were counted after 48 h of  
670 incubation, and transformation efficiency was expressed as the percentage of transformants  
671 among the total viable cells. Fold change was then calculated from the UA159 control with  
672 DMSO (vehicle) addition. Statistical significance was determined by the Student's T-Test  
673

674 *Western blot.*

675 Overnight cultures of *S. mutans* were diluted 1:50 into 35 mL of FMC medium and harvested by  
676 centrifugation when the cultures reached an OD<sub>600</sub> = 0.5. When desired, 2 μM sXIP was added  
677 when the cultures reached an OD<sub>600</sub> value of 0.2 along with 10 μM of selected XrpA peptides.  
678 Cell pellets collected by centrifugation were washed once with buffer A (0.5 M sucrose; 10 mM  
679 Tris-HCl, pH 6.8; 10 mM MgSO<sub>4</sub>) containing 10 μg mL<sup>-1</sup> of phenylmethanesulfonyl fluoride  
680 (PMSF) (ICN Biomedicals Inc.) and resuspended in 0.5 mL Tris-buffered saline (50 mM Tris-  
681 HCl, pH 7.5; 150 mM NaCl). Cells were lysed using a Mini Bead Beater (Biospec Products) in  
682 the presence of 1 volume of glass beads (avg. diam. 0.1 mm) for 30 s intervals, three times,  
683 with incubation on ice between homogenizations. Lysates were then centrifuged at 3,000 × g for  
684 10 minutes at 4°C. Protein concentrations of the resulting supernates were determined using  
685 the bicinchoninic acid assay (BCA; Thermo Scientific) with purified bovine serum albumin as the  
686 standard. Ten microgram aliquots of proteins were mixed with 5X SDS sample buffer (200 mM  
687 Tris-HCl, pH 6.8; 10% [v/v] SDS; 20% [v/v]; 10% [v/v] β-mercaptoethanol; 0.02% [v/v]  
688 bromophenol blue), loaded on a 12.5% polyacrylamide gel with a 5% stacking gel and  
689 separated by electrophoresis at 150 V for 45 minutes. Proteins were transferred to Immobilon-P  
690 polyvinylidene difluoride (PVDF) membranes (Millipore) using a Trans-Blot Turbo transfer  
691 system and a protocol provided by the supplier (BioRad). The membranes were treated with  
692 either primary polyclonal anti-ComX, anti-ComR or anti-ManL (loading control) antisera at a  
693 1:1000 dilution and a secondary peroxidase-labeled, goat anti-rabbit IgG antibody (1:5000  
694 dilution; Kierkegaard & Perry Laboratories, USA). Detection was performed using a SuperSignal  
695 West Pico Chemiluminescent Substrate kit (Thermo Scientific) and visualized with a FluorChem  
696 8900 imaging system (Alpha Innotech, USA).

697

698 *Purification of Recombinant ComR.*

699 The *S. mutans* UA159 *comR* gene was amplified using primers AAAGAATCCTATGTTAAAAGA

700 and CACCCTAGGAGACCCATCAAA and was cloned into the BamHI and AvrII sites of the pET  
701 45b expression vector downstream of the 6x His-tag and separated by an enterokinase  
702 cleavage site. The resulting vector was transformed into *E. coli* DE3 cells (New England  
703 Biolabs). To induce expression of *comR*, 1 mM isopropyl- $\beta$ -D-thiogalactopyranoside (IPTG) was  
704 added to 1 L of growing culture in LB medium once the OD<sub>600</sub> reached 0.6. The culture was  
705 grown for an additional 4 h at 37°C before the cells were pelleted by centrifugation and frozen  
706 overnight at -20°C. The next day, the cells were lysed after suspension into B-PER (Thermo  
707 Scientific) with addition of HALT protease inhibitor (Thermo Scientific) and cellular debris  
708 removed by centrifugation for 20 minutes at 13,000 x g. The His-ComR was column purified  
709 using Ni-NTA resin (QIAGEN) and eluted with 250 mM imidazole (**Supplemental Figure 4**). To  
710 remove the 6x His-tag, 1 mL of a 2-3 mg mL<sup>-1</sup> purified His-ComR sample was dialyzed in  
711 EKMax Buffer overnight (50 mM Tris-HCL pH 8, 1 mM CaCl<sub>2</sub>, 0.1% Tween-20) with 50 U of  
712 EKMax enterokinase (Thermo Scientific) then added and incubated overnight at 4°C. Finally,  
713 the cleaved ComR sample was added to a dialysis cassette to exchange the EKMax buffer with  
714 PBS pH 7.4 overnight. Final protein concentration was determined using the bicinchoninic acid  
715 assay (BCA; Thermo Scientific) with purified bovine serum albumin as the standard. Digestion  
716 was confirmed by SDS-PAGE and Coomassie Blue staining (**Supplemental Figure 5**).

717

#### 718 *Fluorescence Polarization*

719 A 5' Bodipy-labeled self-annealing, stem-loop DNA probe with sequence encompassing the  
720 ECom-box which ComR binds to within the *PcomX* promoter (5'-BODIPY FL-X -  
721 ATGGGACATTTATGTCCTGTCCCCACAGGACATAAATGTCCCAT - 3'), was synthesized  
722 (Thermo Fisher) and kept at a constant concentration of 1  $\mu$ M in all reactions. Purified ComR  
723 protein was serially diluted, ranging from 5 to 2000 nM, and mixed with 10  $\mu$ M sXIP and 10  $\mu$ M  
724 of selected synthetic XrpA peptides unless otherwise noted, in reaction buffer to a final volume  
725 of 250  $\mu$ L (PBS pH 7.4, 10 mM  $\beta$ ME, 1 mM EDTA, 0.1 mg mL<sup>-1</sup> BSA, 20% glycerol (v/v), 0.01%

726 Triton X-100 and  $0.05 \text{ mg mL}^{-1}$  salmon sperm DNA). Reactions were transferred to a Corning®  
727 96-well, half-area, black polystyrene plate prior to incubation at  $37^\circ\text{C}$  for 30 minutes.  
728 Polarization values were measured using a BioTek Synergy 2 plate reader (excitation 485 nm,  
729 emission 528 nm), and the resulting millipolarization values were plotted for each protein  
730 concentration tested to assess protein/peptide interactions. For fluorescent peptides  
731 experiments, a synthetic fluorescein isothiocyanate (FITC)-labeled XrpA-N1 peptide (FITC-AHX-  
732 MIQNCISILRHFLITLK) was used (Biomatik USA) with reaction buffer PBS pH 7.4, 10 mM  $\beta$ ME,  
733  $0.1 \text{ mg mL}^{-1}$  BSA, 20% glycerol (v/v), and 0.01% Triton X-100. Graphing and linear regression  
734 analyses to determine kD values were performed using Prism (GraphPad Software).



735 **ACKNOWLEDGEMENTS**

736 Research reported in this publication was supported by the National Institute of Dental and

737 Craniofacial Research of the National Institutes of Health under Award Numbers R01 DE13239,

738 R01 DE023339, and T90 DE21990.

739

740 **AUTHOR CONTRIBUTIONS**

741 JK, RCS and RAB contributed to the conception and design of the study; JK and RCS

742 performed the experiments, acquired and analyzed the data, JK and RAB interpreted the data;

743 and JK and RAB wrote the manuscript.

744

745 **REFERENCES**

- 746 Abranches, J., Nascimento, M.M., Zeng, L., Browngardt, C.M., Wen, Z.T., Rivera, M.F., and  
747 Burne, R.A. (2008) CcpA regulates central metabolism and virulence gene expression in  
748 *Streptococcus mutans*. *J Bacteriol* **190**: 2340–9  
749
- 750 Ahn, S.-J., Kaspar, J., Kim, J.N., Seaton, K., and Burne, R. a (2014) Discovery of novel peptides  
751 regulating competence development in *Streptococcus mutans*. *J Bacteriol* **196**: 3735–3745.  
752
- 753 Ahn, S.-J., and Rice, K.C. (2016) Understanding the *Streptococcus mutans* Cid/Lrg System  
754 through CidB Function. *Appl Environ Microbiol* **82**: 6189–6203.  
755
- 756 Ahn, S.-J., Wen, Z.T., and Burne, R.A. (2007) Effects of oxygen on virulence traits of  
757 *Streptococcus mutans*. *J Bacteriol* **189**: 8519–27.  
758
- 759 Biswas, I., Jha, J.K., and Fromm, N. (2008) Shuttle expression plasmids for genetic studies in  
760 *Streptococcus mutans*. *Microbiology* **154**: 2275–82.  
761
- 762 Boutry, C., Delplace, B., Clippe, A., Fontaine, L., and Hols, P. (2013) SOS response activation  
763 and competence development are antagonistic mechanisms in *Streptococcus thermophilus*. *J*  
764 *Bacteriol* **195**: 696–707.  
765
- 766 Bowen, W.H., Burne, R.A., Wu, H., and Koo, H. (2017) Oral Biofilms: Pathogens, Matrix, and  
767 Polymicrobial Interactions in Microenvironments. *Trends Microbiol*  
768 <https://doi.org/10.1016/j.tim.2017.09.008>.  
769
- 770 Chandrangu, P., Lemke, J.J., and Gourse, R.L. (2011) The *dksA* promoter is negatively

- 771 feedback regulated by DksA and ppGpp. *Mol Microbiol* **80**: 1337–48.
- 772
- 773 Chang, J.C., and Federle, M.J. (2016) PptAB Exports Rgg Quorum-Sensing Peptides in  
774 *Streptococcus*. *PLoS One* **11**: e0168461.
- 775
- 776 Chang, J.C., LaSarre, B., Jimenez, J.C., Aggarwal, C., and Federle, M.J. (2011) Two Group A  
777 Streptococcal Peptide Pheromones Act through Opposing Rgg Regulators to Control Biofilm  
778 Development. *PLoS Pathog* **7**: e1002190.
- 779
- 780 Chatteraj, P., Banerjee, A., Biswas, S., and Biswas, I. (2010) ClpP of *Streptococcus mutans*  
781 differentially regulates expression of genomic islands, mutacin production, and antibiotic  
782 tolerance. *J Bacteriol* **192**: 1312–23.
- 783
- 784 Desai, K., Mashburn-Warren, L., Federle, M.J., and Morrison, D.A. (2012) Development of  
785 competence for genetic transformation of *Streptococcus mutans* in a chemically defined  
786 medium. *J Bacteriol* **194**: 3774–80.
- 787
- 788 Do, H., Makthal, N., VanderWal, A.R., Rettel, M., Savitski, M.M., Peschek, N., *et al.* (2017)  
789 Leaderless secreted peptide signaling molecule alters global gene expression and increases  
790 virulence of a human bacterial pathogen. *Proc Natl Acad Sci U S A* **114**: E8498–E8507.
- 791
- 792 Fontaine, L., Boutry, C., Frahan, M.H. de, Delplace, B., Fremaux, C., Horvath, P., *et al.* (2009) A  
793 Novel Pheromone Quorum-Sensing System Controls the Development of Natural Competence  
794 in *Streptococcus thermophilus* and *Streptococcus salivarius*. *J Bacteriol* **192**: 1444–1454.
- 795
- 796 Fontaine, L., Goffin, P., Dubout, H., Delplace, B., Baulard, A., Lecat-Guillet, N., *et al.* (2013)

797 Mechanism of competence activation by the ComRS signalling system in streptococci. *Mol*  
798 *Microbiol* **87**: 1113–32.

799

800 Fuqua, W.C., Winans, S.C., and Greenberg, E.P. (1994) Quorum sensing in bacteria: the LuxR-  
801 LuxI family of cell density-responsive transcriptional regulators. *J Bacteriol* **176**: 269–75.

802

803 Furio, M. De, Ahn, S.J., Burne, R.A., and Hagen, S.J. (2017) Oxidative Stressors Modify the  
804 Response of *Streptococcus mutans* to Its Competence Signal Peptides. *Appl Environ Microbiol*  
805 **83**: e01345-17.

806

807 Gamba, P., Jonker, M.J., and Hamoen, L.W. (2015) A Novel Feedback Loop That Controls  
808 Bimodal Expression of Genetic Competence. *PLoS Genet* **11**: e1005047.

809

810 Gardan, R., Besset, C., Gitton, C., Guillot, A., Fontaine, L., Hols, P., and Monnet, V. (2013)  
811 Extracellular life cycle of ComS, the competence-stimulating peptide of *Streptococcus*  
812 *thermophilus*. *J Bacteriol* **195**: 1845–55.

813

814 Greenberg, E.P. (2003) Bacterial communication and group behavior. *J Clin Invest* **112**: 1288–  
815 90.

816

817 Guo, Q., Ahn, S.-J., Kaspar, J., Zhou, X., and Burne, R.A. (2014) Growth phase and pH  
818 influence peptide signaling for competence development in *Streptococcus mutans*. *J Bacteriol*  
819 **196**: 227–36.

820

821 Hagen, S.J., and Son, M. (2017) Origins of heterogeneity in *Streptococcus mutans* competence:  
822 interpreting an environment-sensitive signaling pathway. *Phys Biol* **14**: 15001.

823 Haustenne, L., Bastin, G., Hols, P., and Fontaine, L. (2015) Modeling of the ComRS Signaling  
824 Pathway Reveals the Limiting Factors Controlling Competence in *Streptococcus thermophilus*.  
825 *Front Microbiol* **6**.  
826  
827 Håvarstein, L.S. (2010) Increasing competence in the genus *Streptococcus*. *Mol Microbiol* **78**:  
828 541–4.  
829  
830 Håvarstein, L.S., Coomaraswamy, G., and Morrison, D.A. (1995) An unmodified  
831 heptadecapeptide pheromone induces competence for genetic transformation in *Streptococcus*  
832 *pneumoniae*. *Proc Natl Acad Sci U S A* **92**: 11140–4.  
833  
834 Herzberg, C., Weidinger, L.A.F., Dörrbecker, B., Hübner, S., Stülke, J., and Commichau, F.M.  
835 (2007) SPINE: A method for the rapid detection and analysis of protein–protein interactions in  
836 vivo. *Proteomics* **7**: 4032–4035.  
837  
838 Hui, F.M., Zhou, L., and Morrison, D.A. (1995) Competence for genetic transformation in  
839 *Streptococcus pneumoniae*: organization of a regulatory locus with homology to two lactococcal  
840 A secretion genes. *Gene* **153**: 25–31.  
841  
842 Hung, D.C.I., Downey, J.S., Ayala, E.A., Kreth, J., Mair, R., Senadheera, D.B., *et al.* (2011)  
843 Characterization of DNA binding sites of the ComE response regulator from *Streptococcus*  
844 *mutans*. *J Bacteriol* **193**: 3642–52.  
845  
846 Johnston, C., Martin, B., Fichant, G., Polard, P., and Claverys, J.-P. (2014) Bacterial  
847 transformation: distribution, shared mechanisms and divergent control. *Nat Rev Microbiol* **12**:  
848 181–96.

- 849 Kaspar, J., Ahn, S.-J., Palmer, S.R., Choi, S.C., Stanhope, M.J., and Burne, R.A. (2015) A  
850 Unique ORF within the *comX* gene of *Streptococcus mutans* Regulates Genetic Competence  
851 and Oxidative Stress Tolerance. *Mol Microbiol* **96**: 463–482.  
852
- 853 Kaspar, J., Kim, J.N., Ahn, S.-J., and Burne, R.A. (2016) An Essential Role for (p)ppGpp in the  
854 Integration of Stress Tolerance, Peptide Signaling, and Competence Development in  
855 *Streptococcus mutans*. *Front Microbiol* **7**: 1162.  
856
- 857 Kaspar, J., Underhill, S.A.M., Shields, R.C., Reyes, A., Rosenzweig, S., Hagen, S.J., and  
858 Burne, R.A. (2017) Intercellular communication via the *comX*-Inducing Peptide (XIP) of  
859 *Streptococcus mutans*. *J Bacteriol* JB.00404-17.  
860
- 861 Khan, R., Rukke, H. V., Høvik, H., Åmdal, H.A., Chen, T., Morrison, D.A., and Petersen, F.C.  
862 (2016) Comprehensive Transcriptome Profiles of *Streptococcus mutans* UA159 Map Core  
863 Streptococcal Competence Genes. *mSystems* **1**: e00038-15.  
864
- 865 Khan, R., Rukke, H. V, Ricomini Filho, A.P., Fimland, G., Arntzen, M.Ø., Thiede, B., and  
866 Petersen, F.C. (2012) Extracellular identification of a processed type II ComR/ComS  
867 pheromone of *Streptococcus mutans*. *J Bacteriol* **194**: 3781–8.  
868
- 869 Kreth, J., Hung, D.C.I., Merritt, J., Perry, J., Zhu, L., Goodman, S.D., *et al.* (2007) The response  
870 regulator ComE in *Streptococcus mutans* functions both as a transcription activator of mutacin  
871 production and repressor of CSP biosynthesis. *Microbiology* **153**: 1799–807.  
872
- 873 Lau, P.C., Sung, C.K., Lee, J.H., Morrison, D.A., and Cvitkovitch, D.G. (2002) PCR ligation  
874 mutagenesis in transformable streptococci: application and efficiency. *J Microbiol Methods* **49**:

875 193–205.

876

877 LeBlanc, D.J., Lee, L.N., and Abu-Al-Jaibat, A. (1992) Molecular, genetic, and functional  
878 analysis of the basic replicon of pVA380-1, a plasmid of oral streptococcal origin. *Plasmid* **28**:  
879 130–145.

880

881 Lemos, J.A., Quivey, R.G., Koo, H., and Abranches, J. (2013) *Streptococcus mutans*: a new  
882 Gram-positive paradigm? *Microbiology* **159**: 436–45.

883

884 Li, H., Handsaker, B., Wysoker, A., Fennell, T., Ruan, J., Homer, N., *et al.* (2009) The Sequence  
885 Alignment/Map format and SAMtools. *Bioinformatics* **25**: 2078–9.

886

887 Li, Y.H., Lau, P.C., Lee, J.H., Ellen, R.P., and Cvitkovitch, D.G. (2001) Natural genetic  
888 transformation of *Streptococcus mutans* growing in biofilms. *J Bacteriol* **183**: 897–908.

889

890 Liao, S., Klein, M.I., Heim, K.P., Fan, Y., Bitoun, J.P., Ahn, S.-J., *et al.* (2014) *Streptococcus*  
891 *mutans* extracellular DNA is upregulated during growth in biofilms, actively released via  
892 membrane vesicles, and influenced by components of the protein secretion machinery. *J*  
893 *Bacteriol* **196**: 2355–66.

894

895 Martin, B., Soulet, A.-L., Mirouze, N., Prudhomme, M., Mortier-Barrière, I., Granadel, C., *et al.*  
896 (2013) ComE/ComE~P interplay dictates activation or extinction status of pneumococcal X-state  
897 (competence). *Mol Microbiol* **87**: 394–411.

898

899 Mashburn-Warren, L., Morrison, D.A., and Federle, M.J. (2010) A novel double-tryptophan



900 peptide pheromone controls competence in *Streptococcus* spp. via an Rgg regulator. *Mol*  
901 *Microbiol* **78**: 589–606.

902

903 Mashburn-Warren, L., Morrison, D.A., and Federle, M.J. (2012) The cryptic competence  
904 pathway in *Streptococcus pyogenes* is controlled by a peptide pheromone. *J Bacteriol* **194**:  
905 4589–600.

906

907 Mirouze, N., Bergé, M.A., Soulet, A.-L., Mortier-Barrière, I., Quentin, Y., Fichant, G., *et al.*  
908 (2013) Direct involvement of DprA, the transformation-dedicated RecA loader, in the shut-off of  
909 pneumococcal competence. *Proc Natl Acad Sci U S A* **110**: E1035-44.

910

911 Moye, Z.D., Son, M., Rosa-Alberty, A.E., Zeng, L., Ahn, S.-J., Hagen, S.J., and Burne, R.A.  
912 (2016) Effects of Carbohydrate Source on Genetic Competence in *Streptococcus mutans*. *Appl*  
913 *Environ Microbiol* AEM.01205-16.

914

915 Okamoto, M., Imai, S., Miyanohara, M., Saito, W., Momoi, Y., Abo, T., *et al.* (2013)  
916 *Streptococcus troglodytae* sp. nov., from the chimpanzee oral cavity. *Int J Syst Evol Microbiol*  
917 **63**: 418–422.

918

919 Papenfort, K., and Bassler, B.L. (2016) Quorum sensing signal–response systems in Gram-  
920 negative bacteria. *Nat Rev Microbiol* **14**: 576–588.

921

922 Perry, J.A., Jones, M.B., Peterson, S.N., Cvitkovitch, D.G., and Lévesque, C.M. (2009) Peptide  
923 alarmone signalling triggers an auto-active bacteriocin necessary for genetic competence. *Mol*  
924 *Microbiol* **72**: 905–17.

925

- 926 Robinson, J.T., Thorvaldsdóttir, H., Winckler, W., Guttman, M., Lander, E.S., Getz, G., and  
927 Mesirov, J.P. (2011) Integrative genomics viewer. *Nat Biotechnol* **29**: 24–6.  
928
- 929 Schmieder, R., and Edwards, R. (2011) Quality control and preprocessing of metagenomic  
930 datasets. *Bioinformatics* **27**: 863–4.  
931
- 932 Shanker, E., Morrison, D.A., Talagas, A., Nessler, S., Federle, M.J., and Prehna, G. (2016)  
933 Pheromone Recognition and Selectivity by ComR Proteins among *Streptococcus* Species.  
934 *PLOS Pathog* **12**: e1005979.  
935
- 936 Shields, R.C., and Burne, R.A. (2016) Growth of *Streptococcus mutans* in Biofilms Alters  
937 Peptide Signaling at the Sub-population Level. *Front Microbiol* **7**: 1075.  
938
- 939 Son, M., Ahn, S.-J., Guo, Q., Burne, R.A., and Hagen, S.J. (2012) Microfluidic study of  
940 competence regulation in *Streptococcus mutans*: environmental inputs modulate bimodal and  
941 unimodal expression of *comX*. *Mol Microbiol* **86**: 258–72.  
942
- 943 Son, M., Ghoreishi, D., Ahn, S.-J., Burne, R.A., and Hagen, S.J. (2015) Sharply Tuned pH  
944 Response of Genetic Competence Regulation in *Streptococcus mutans*: a Microfluidic Study of  
945 the Environmental Sensitivity of *comX*. *Appl Environ Microbiol* **81**: 5622–31.  
946
- 947 Straume, D., Stamsås, G.A., and Håvarstein, L.S. (2015) Natural transformation and genome  
948 evolution in *Streptococcus pneumoniae*. *Infect Genet Evol* **33**: 371–80.  
949
- 950 Talagas, A., Fontaine, L., Ledesma-Garca, L., Mignolet, J., Li de la Sierra-Gallay, I., Lazar, N.,  
951 *et al.* (2016) Structural Insights into Streptococcal Competence Regulation by the Cell-to-Cell

952 Communication System ComRS. *PLOS Pathog* **12**: e1005980.

953

954 Terleckyj, B., and Shockman, G.D. (1975) Amino acid requirements of *Streptococcus mutans*  
955 and other oral streptococci. *Infect Immun* **11**: 656–664.

956

957 Terleckyj, B., Willett, N.P., and Shockman, G.D. (1975) Growth of several cariogenic strains of  
958 oral streptococci in a chemically defined medium. *Infect Immun* **11**: 649–55.

959

960 Tomasz, A. (1965) Control of the Competent State in Pneumococcus by a Hormone-Like Cell  
961 Product: An Example for a New Type of Regulatory Mechanism in Bacteria. *Nature* **208**: 155–  
962 159.

963

964 Waterhouse, J.C., Swan, D.C., and Russell, R.R.B. (2007) Comparative genome hybridization  
965 of *Streptococcus mutans* strains. *Oral Microbiol Immunol* **22**: 103–110.

966

967 Wei, H., and Håvarstein, L.S. (2012) Fratricide is essential for efficient gene transfer between  
968 pneumococci in biofilms. *Appl Environ Microbiol* **78**: 5897–905.

969

970 Wenderska, I.B., Lukenda, N., Cordova, M., Magarvey, N., Cvitkovitch, D.G., and Senadheera,  
971 D.B. (2012) A novel function for the competence inducing peptide, XIP, as a cell death effector  
972 of *Streptococcus mutans*. *FEMS Microbiol Lett* **336**: 104–12.

973

974 Weng, L., Piotrowski, A., and Morrison, D.A. (2013) Exit from Competence for Genetic  
975 Transformation in *Streptococcus pneumoniae* Is Regulated at Multiple Levels. *PLoS One* **8**:  
976 e64197.

977

978 Whiteley, M., Diggle, S.P., and Greenberg, E.P. (2017) Progress in and promise of bacterial  
979 quorum sensing research. *Nature* **551**: 313–320.

980

981 Wilkening, R. V., Chang, J.C., and Federle, M.J. (2016) PepO, a CovRS-controlled  
982 endopeptidase, disrupts *Streptococcus pyogenes* quorum sensing. *Mol Microbiol* **99**: 71-87.

983

984 Zeng, L., Choi, S.C., Danko, C.G., Siepel, A., Stanhope, M.J., and Burne, R.A. (2013) Gene  
985 regulation by CcpA and catabolite repression explored by RNA-Seq in *Streptococcus mutans*.

986 *PLoS One* **8**: e60465.

987

988

989 **TABLES**

990 TABLE 1. List of strains

| Strain or Plasmid                    | Relevant Characteristics                                                                                                          | Source or Reference            |
|--------------------------------------|-----------------------------------------------------------------------------------------------------------------------------------|--------------------------------|
| <i>S. mutans</i> Strains             |                                                                                                                                   |                                |
| UA159                                | Wild-type                                                                                                                         | ATCC 700610                    |
| $\Delta xrpA$                        | Inactivation of <i>xrpA</i> start codon;<br><i>comX</i> ::T162C                                                                   | (Kaspar <i>et al.</i> , 2015)  |
| 184XrpA/UA159                        | UA159 harboring overexpression of <i>xrpA</i> on pIB184, Em <sup>R</sup>                                                          | (Kaspar <i>et al.</i> , 2015)  |
| $\Delta comR$                        | <i>comR</i> (SMU.61) :: Em <sup>R</sup>                                                                                           | (Kaspar <i>et al.</i> , 2016)  |
| $\Delta comX$                        | <i>comX</i> (SMU.1997) :: Em <sup>R</sup>                                                                                         | (Kaspar <i>et al.</i> , 2015)  |
| PcomX::gfp/UA159                     | UA159 harboring <i>gfp</i> fluorescent reporter of PcomX                                                                          | (Son <i>et al.</i> , 2012)     |
| PcomX::gfp/ $\Delta xrpA$            | $\Delta xrpA$ harboring <i>gfp</i> fluorescent reporter of PcomX                                                                  | This study                     |
| PcomX::gfp/184XrpA                   | 184XrpA/UA159 harboring <i>gfp</i> fluorescent reporter of PcomX                                                                  | This study                     |
| PcomS::gfp/UA159                     | UA159 harboring <i>gfp</i> fluorescent reporter of PcomS                                                                          | (Kaspar <i>et al.</i> , 2017)  |
| PcomS::gfp/ $\Delta xrpA$            | $\Delta xrpA$ harboring <i>gfp</i> fluorescent reporter of PcomS                                                                  | This study                     |
| PcomS::gfp/184XrpA                   | 184XrpA/UA159 harboring <i>gfp</i> fluorescent reporter of PcomS                                                                  | This study                     |
| PcomX::gfp/ $\Delta comS$            | $\Delta comS$ ( <i>comS</i> :: Em <sup>R</sup> ) harboring <i>gfp</i> fluorescent reporter of PcomX                               | (Son <i>et al.</i> , 2012)     |
| PcomX::gfp/ $\Delta comS\Delta xrpA$ | $\Delta comS$ in <i>comX</i> ::T162C harboring <i>gfp</i> fluorescent reporter of PcomX                                           | This study                     |
| 184ComR-Strep/UA159                  | UA159 harboring overexpression of <i>comR</i> with addition of (G4S) <sub>2</sub> linker and Strep-tag on pIB184, Em <sup>R</sup> | This study                     |
| Plasmids                             |                                                                                                                                   |                                |
| pDL278                               | Escherichia coli - Streptococcus shuttle vector, Sp <sup>R</sup>                                                                  | (LeBlanc <i>et al.</i> , 1992) |
| pIB184                               | Shuttle expression plasmid with the constitutive P23 promoter, Em <sup>R</sup>                                                    | (Biswas <i>et al.</i> , 2008)  |

991 \* Em, erythromycin; Sp, spectinomycin.

992

993 TABLE 2. Results of 2D DIGE Spot Identification by LC-MS/MS  
994

| SMU Number | Gene/Protein Designation | Protein Description                                   | Spot / Gel Slice Number* | Protein Score C.I. % | Total Ior Score C.I. |
|------------|--------------------------|-------------------------------------------------------|--------------------------|----------------------|----------------------|
| SMU.15     | <i>ftsH</i>              | cell division protein                                 | S10                      | 0                    | 73                   |
| SMU.99     | <i>fbaA</i>              | fructose-bisphosphate aldolase                        | S36                      | 100                  | 100                  |
| SMU.148    | <i>adhE</i>              | bifunctional acetaldehyde-CoA / alcohol dehydrogenase | S3, S4                   | 100                  | 100                  |
| SMU.289    | <i>sgaR</i>              | putative transcriptional regulator                    | G4                       | 95                   | 99                   |
| SMU.359    | <i>fusA</i>              | elongation factor G                                   | S6                       | 100                  | 100                  |
| SMU.360    | <i>gapC</i>              | glyceraldehyde-3-phosphate dehydrogenase              | S29, S30                 | 100                  | 100                  |
| SMU.546    | <i>typA</i>              | GTP-binding protein                                   | S6                       | 100                  | 100                  |
| SMU.640c   |                          | transcriptional regulator                             | S47                      | 41                   | 0                    |
| SMU.714    | EF-Tu                    | translation elongation factor                         | S14, S15                 | 100                  | 100                  |
| SMU.1077   | <i>pgm</i>               | phosphomannomutase                                    | S11                      | 100                  | 100                  |
| SMU.1120   |                          | putative sugar ABC transporter                        | S36                      | 0                    | 96                   |
| SMU.1122   | <i>cdd</i>               | putative cytidine deaminase                           | S44                      | 0                    | 63                   |
| SMU.1178c  |                          | Amino acid ABC transporter                            | S20                      | 0                    | 43                   |
| SMU.1190   | <i>pykF</i>              | pyruvate kinase                                       | S14, S15                 | 100                  | 100                  |
| SMU.1208c  |                          | hypothetical protein                                  | S44, S47                 | 0                    | 50                   |
| SMU.1247   | <i>eno</i>               | enolase                                               | S18                      | 100                  | 100                  |
| SMU.1367c  |                          | methylase                                             | S19, S21                 | 0                    | 93                   |
| SMU.1535   |                          | glycogen phosphorylase                                | S24                      | 0                    | 44                   |
| SMU.1572   | <i>murZ</i>              | UDP-N-acetylglucosamine-1-carboxyvinyl transferase    | S51                      | 0                    | 44                   |
| SMU.1599   | <i>celR</i>              | transcriptional regulator                             | S18                      | 0                    | 58                   |
| SMU.1671c  |                          | hypothetical protein                                  | S20, S21                 | 0                    | 82                   |
| SMU.1791c  |                          | putative nucleotidyltransferase                       | S5                       | 0                    | 88                   |
| SMU.1954   | <i>groEL</i>             | protein chaperonin                                    | S11                      | 100                  | 100                  |
| SMU.1967   | <i>ssb2</i>              | single-stranded DNA-binding protein                   | S56, S57, G3             | 100                  | 100                  |
| SMU.2085   | <i>recA</i>              | DNA recombination and repair                          | S18, S19, S20, S21       | 100                  | 100                  |
| SMU.2154c  |                          | putative peptidase                                    | S1                       | 0                    | 92                   |
| #          | <i>xrpA</i>              | Potential inhibitor of competence                     | S1, S14, S15, S36, G5    | 0                    | 82                   |

995 \*Spot (S) and gel slice (G) numbers correspond to Figures 4 and Supplemental Figure S1,  
996 respectively

997 # Not annotated

998

999 TABLE 3. Synthesized XrpA Peptides and Determined ComR Kd from Fluorescent Polarization  
1000

| Peptide | Start Position | End Position | Sequence              | Length | ComR Kd (nM)* |
|---------|----------------|--------------|-----------------------|--------|---------------|
|         |                |              |                       |        | 153 ± 10      |
| 1       | 5              | 20           | CISILRHVFLITLKMFM     | 16     | 651 ± 99      |
| 2       | 22             | 34           | VSKKVRNVVLIIEC        | 13     | 198 ± 17      |
| 3       | 35             | 46           | LMKKSURLNTVC          | 12     | 169 ± 12      |
| 4       | 56             | 69           | IFYFVIVCLHINKV        | 14     | 165 ± 13      |
| N1      | 1              | 18           | MIQNCISILRHVFLITLK    | 18     | 783 ± 204     |
| N2      | 18             | 38           | MFCVSKKVRNVVLIIECLMKK | 20     | 400 ± 49      |
| S1      |                |              | LFKFTCVRLILIISHM      | 16     | 248 ± 38      |
| S2      |                |              | KKNVIECVSVRVL         | 13     | 147 ± 11      |

1001 \*ComR Kd determined from fluorescent polarization experiment shown in Figure 7A-D

1002 **FIGURE LEGENDS**

1003 *Figure 1. Transcriptome Analysis of  $\Delta xrpA$  and UA159 with sXIP addition.* Volcano plots of (A)  
1004  $\Delta xrpA$  and (B) UA159 + 2  $\mu$ M sXIP from RNA-Seq results compared to UA159 of three  
1005 independent replicates grown in FMC medium to OD<sub>600</sub> = 0.5. Log<sub>2</sub> fold change and false  
1006 discovery rates (FDR) converted to  $-\log_{10}$  P-values were calculated from Degust using edgeR  
1007 analysis. Genes of interest that were  $\geq 1.5$  log<sub>2</sub> fold change and had a  $\geq 4$   $-\log_{10}$  P-value were  
1008 highlighted either in red (upregulated) or blue (downregulated) and are listed in Tables S2 and  
1009 S3. (C) Visual representation of read counts accumulated in either the *comS*, *comX* or *comY*  
1010 coding sequences in either the UA159 (blue bars) or  $\Delta xrpA$  (orange bars) genetic backgrounds.  
1011 Mapped short read alignments were converted in “.bam” files and visualized with the IGV  
1012 genome browser.

1013  
1014 *Figure 2. Effect of XrpA on activation of comX and comS promoters.* Transcriptional activation  
1015 assays using a fused-*gfp* reporter for (A) *PcomX* and (B) *PcomS* in wild-type (UA159 – green  
1016 circles), *comX*::T162C ( $\Delta xrpA$  – blue squares) or *xrpA* overexpression (184XrpA – orange  
1017 diamonds) genetic backgrounds. Black lines represent growth (OD<sub>600</sub>, right axis) of each of the  
1018 respective reporter strains during the assay. Each data point shown is the average of three  
1019 independent biological replicates with four measured technical replicates.

1020  
1021 *Figure 3. XrpA changes subpopulation behaviors.* Histogram of cell counts from flow cytometry  
1022 analysis of the *PcomX*::*gfp* reporter strain in UA159 (black lines) or  $\Delta xrpA$  (red lines) grown in  
1023 BHI with addition of either (A) 100 nM or (B) 1000 nM sCSP. For experiments with FMC and  
1024 addition of 2  $\mu$ M sXIP, reporter strains in either (C) UA159 or (D)  $\Delta comS$  background were  
1025 stained with propidium iodide before analysis. A total of 50,000 cells were counted in three  
1026 independent replicates for each experiment. (E) eDNA release of selected strains from three



1027 independent overnight cultures grown in CDM media. eDNA release was calculated by taking  
1028 the arbitrary fluorescent units and dividing by the recorded OD<sub>600</sub> at the time of harvest. (F)  
1029 Change in biofilm biomass compared to UA159 using either CDM media with 20 mM glucose  
1030 (blue bars) as a sole carbohydrate source or with 15 mM glucose and 2.5 mM sucrose (orange  
1031 bars) as the carbohydrate source after 48 hours of growth. Data represent the average of three  
1032 independent biological replicates with four technical replicates each. Statistical analysis was  
1033 calculated by the Student's *t*-test; \* *P* < 0.05.

1034  
1035 *Figure 4. 2D DIGE of SPINE Experiment.* Individual 2D gels of (A) pIB184, (B) ComR-Strep  
1036 without sXIP addition and (C) ComR-Strep with 2 μM sXIP elutions obtained during SPINE  
1037 experiment. (D) Combined image of each individual 2D gel with pIB184 in blue, ComR-Strep  
1038 without sXIP in green and ComR-Strep with addition in red. Selected spots of interest are circled  
1039 and labeled. Y-axis is labeled with molecular weights and X-axis with pH ranges.

1040  
1041 *Figure 5. PcomX activities with addition of various synthetic XrpA peptides.* Transcriptional  
1042 activation assays using a fused *PcomX::gfp* reporter strain in CDM medium with addition of 10  
1043 μM of various synthesized XrpA peptides (Table 3). (A) Addition of XrpA peptides 1-4, (B)  
1044 comparison between XrpA-1 and a scrambled version of XpA-1, (C) Dose-dependent inhibition  
1045 of *PcomX* activity by various concentrations of XrpA-1, (D) comparison between N-terminal  
1046 specific XrpA-N1 and XrpA-N2 peptides. Colored lines represent relative *PcomX* expression  
1047 (arbitrary fluorescent units divided by OD<sub>600</sub>, left axis). Black lines represent growth (OD<sub>600</sub>, right  
1048 axis) of each of the respective reporter strains during the assay. Each data point shown is the  
1049 average of three independent biological replicates with four measured technical replicates.

1050

1051 *Figure 6. XrpA changes subpopulation behaviors.* (A) Fold change in transformation efficiency  
1052 with 10  $\mu$ M XrpA peptides compared to DMSO-only control (vehicle; =1) in FMC medium with  
1053 0.5  $\mu$ M sXIP addition. Data represents the average of three independent replicates. (B) Western  
1054 blot using 10  $\mu$ g of whole cell lysates of UA159 with addition of 10  $\mu$ M XrpA peptides in FMC  
1055 medium with 0.5  $\mu$ M sXIP addition. Cells were grown to  $OD_{600\text{ nm}} = 0.5$  before harvesting.  
1056 Primary antisera, raised against the corresponding protein, were used for detection. ManL (the  
1057 EIIAB domain of the glucose PTS permease) served as a loading control. Numbers under each  
1058 respective blot represent densitometry readings with the DMSO control set to 100%. (C)  
1059 Change in biofilm biomass of UA159 with addition of 10  $\mu$ M XrpA peptides using either CDM  
1060 media with 20 mM glucose (blue bars) as a sole carbohydrate source or with 15 mM glucose  
1061 and 2.5 mM sucrose (orange bars) as the carbohydrate source after 48 hours of growth. Data  
1062 represents the average of three independent replicates with four technical replicates each. (D)  
1063 eDNA release of UA159 with addition of 10  $\mu$ M XrpA peptides from three independent overnight  
1064 cultures grown in CDM media. eDNA release was calculated by taking the arbitrary fluorescent  
1065 units and dividing by the recorded  $OD_{600}$  at the time of harvest. All statistical analysis for this  
1066 figure was calculated by the student's T-Test, \*  $P < 0.001$ .

1067  
1068 *Figure 7. Fluorescent Polarization experiments confirm XrpA-ComR interaction.* Fluorescent  
1069 polarization (FP) curves of increasing concentrations of purified ComR binding to 10 nM of  
1070 PcomX dsDNA probe in the presence of 10  $\mu$ M sXIP and 10  $\mu$ M of various XrpA peptides (Table  
1071 3). Control (black lines) represents binding in the absence of XrpA peptides. (A) addition of XrpA  
1072 peptides 1-4, (B) addition of XrpA peptides N1 and N2, (C) comparison between XrpA-1 and a  
1073 scrambled version of XrpA-1 and (D) comparison between XrpA-2 and a scrambled version of  
1074 XrpA-2. (E). Binding of 10 nM FITC-labeled XrpA-N1 peptide to increasing concentrations of  
1075 purified ComR, with and without 10  $\mu$ M sXIP addition. No DNA probe is present in this

1076 experiment. (F) Increasing concentrations of synthetic unlabeled XrpA-N1 peptide were  
1077 assessed for their ability to compete with FITC-labeled XrpA-N1 for their binding to increasing  
1078 concentrations of purified ComR. No DNA probe is present in this experiment. Data shown are  
1079 averaged from three independent experiments. Kd values for figures A-D are shown in Table 3.

1080

1081 *Figure 8. Model for XrpA Modulation of ComRS Signaling.* Current model for the role of XrpA in  
1082 inhibition of ComRS activity and in cell fate. When present and active, XrpA (yellow) interacts  
1083 with ComR (blue) independently of whether ComR is in a complex with XIP (orange), resulting  
1084 in diminished affinity of ComR for its target in *PcomX*. XrpA inhibition of ComR prevents the  
1085 ComR-XIP complex from over-amplifying the competence activation signal, thereby maintaining  
1086 a balance within the population of cells that induce competence and internalize DNA with a  
1087 group of cells that undergo lysis providing DNA as a nutrient source, a source for genetic  
1088 diversification, and/or a source of eDNA that contributes to extracellular matrix formation. One  
1089 potential mechanism by which XrpA curtails proficient ComR-XIP activation of *PcomX* is through  
1090 inefficient dimer formation between ComR-XIP complexes. When XrpA is absent from the  
1091 circuit, as in the case of the *xrpA* mutant ( $\Delta xrpA$ ; *comX*::T162C), over-amplification of ComRS  
1092 signaling occurs. This leads to increases in the accumulation of the sigma factor ComX (green);  
1093 which in turn results in an increase in the subpopulation of cells that undergo cell lysis.

1094

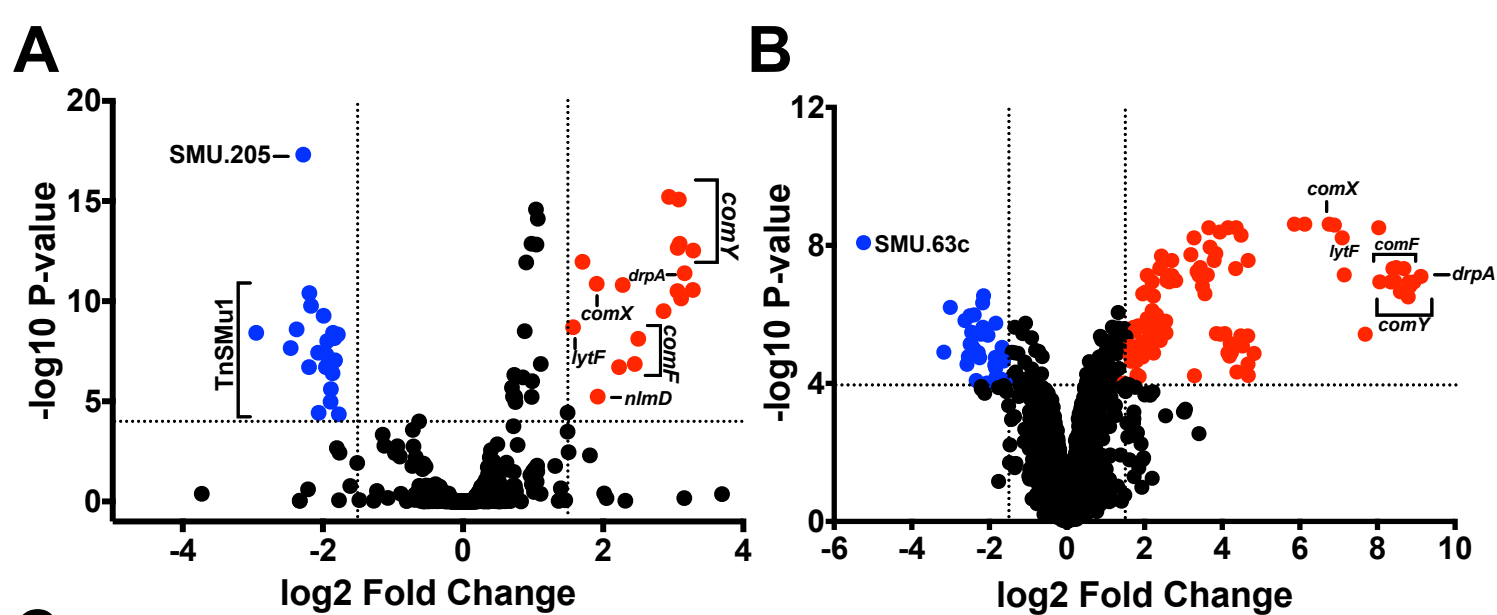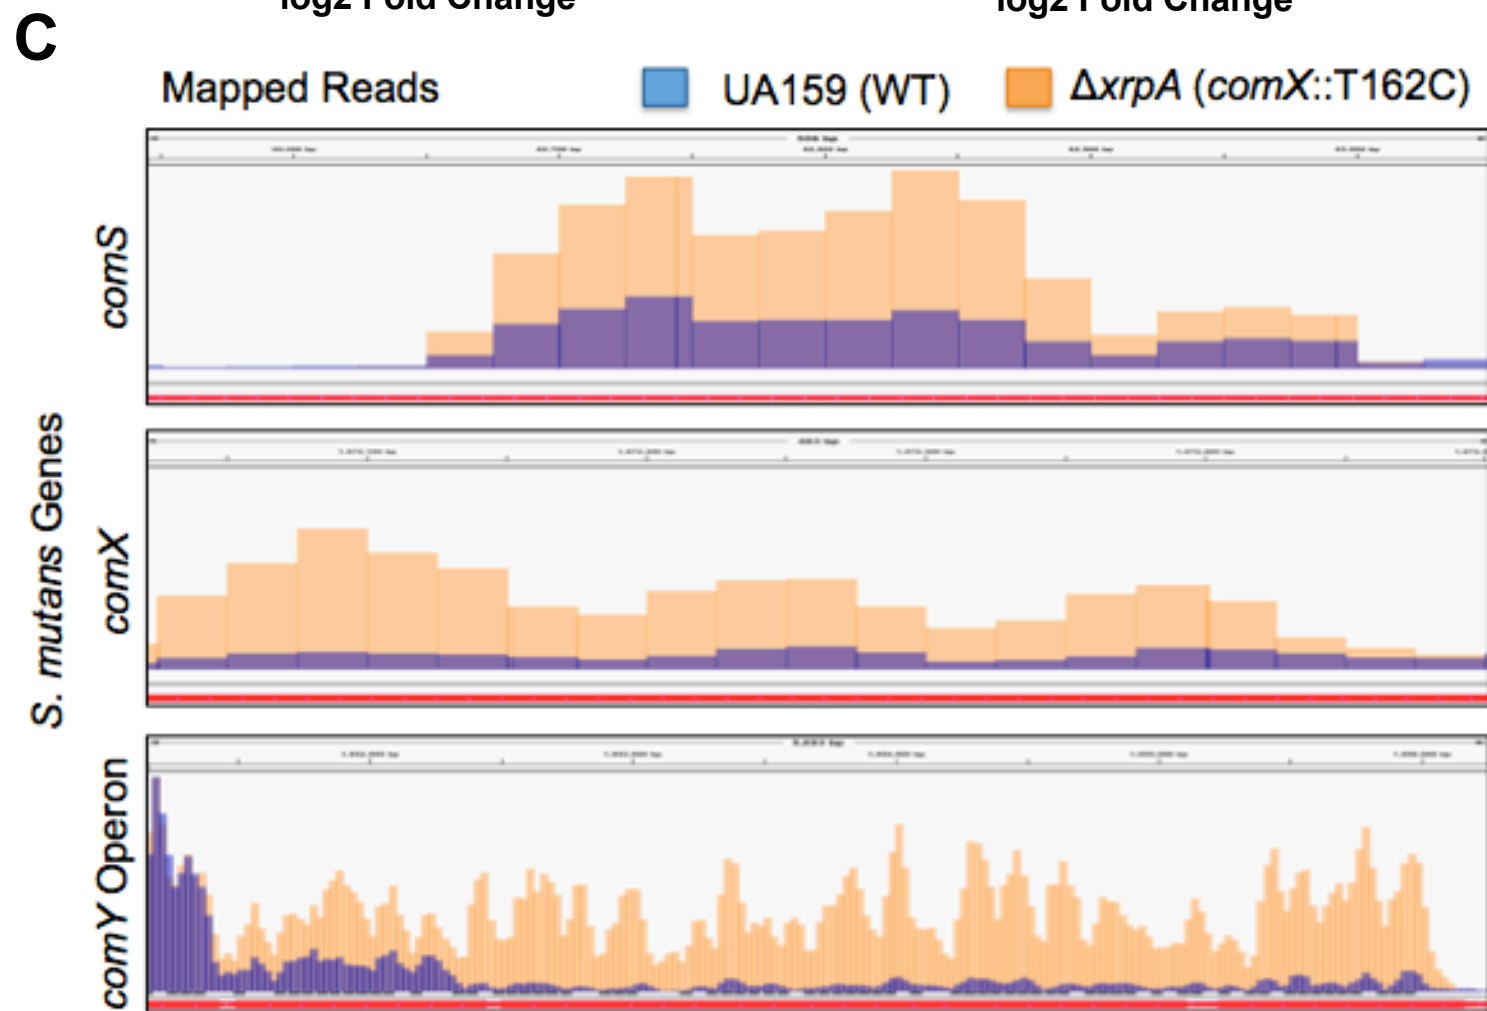

**A**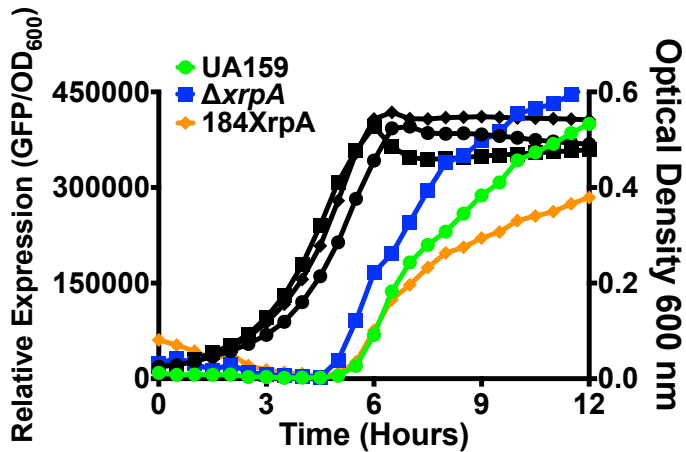**B**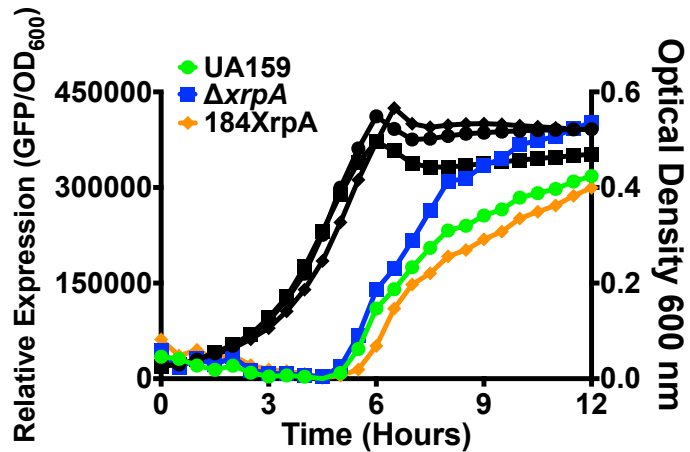

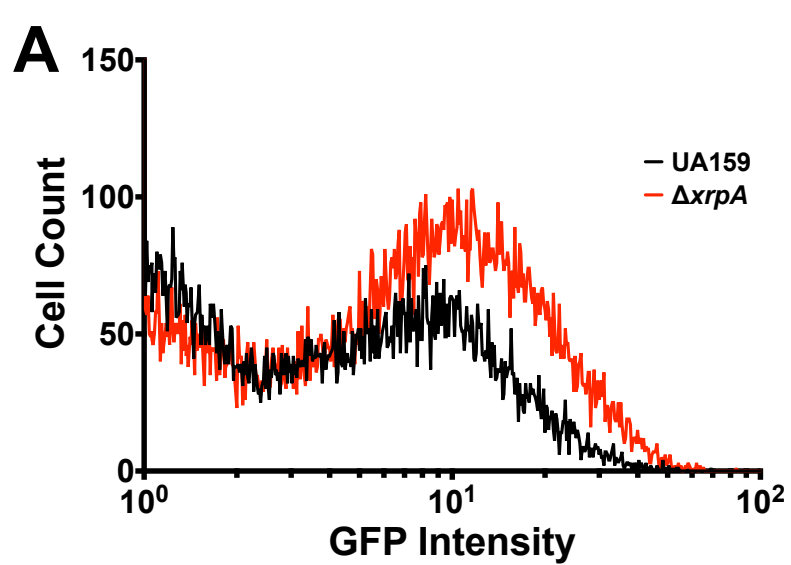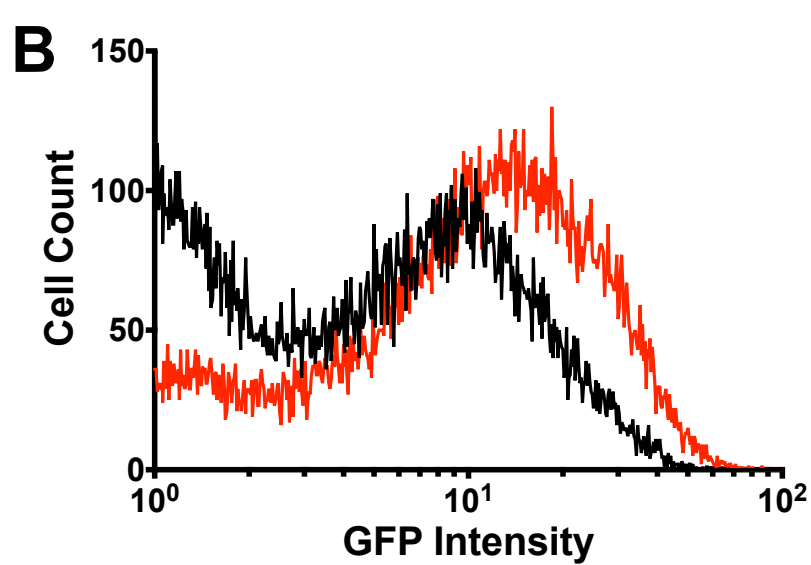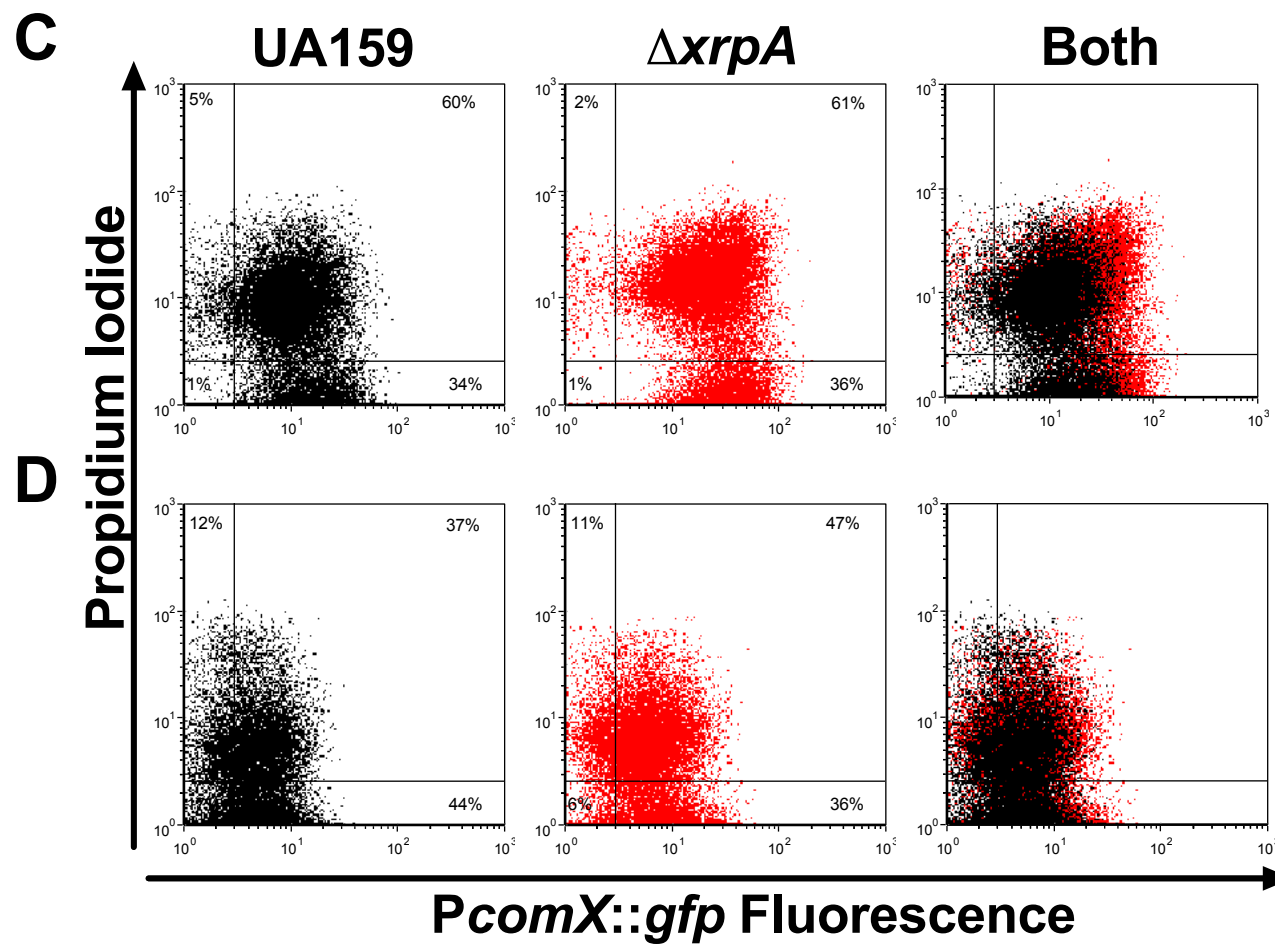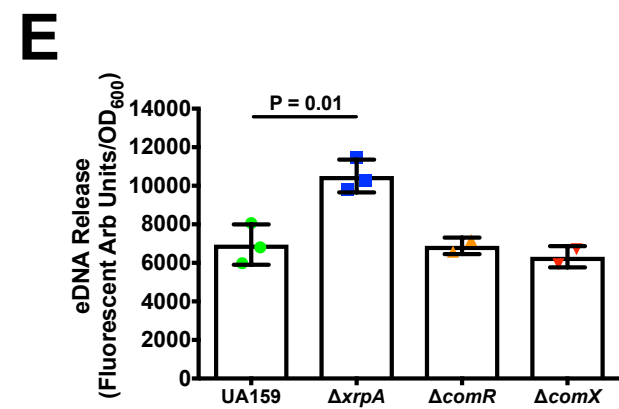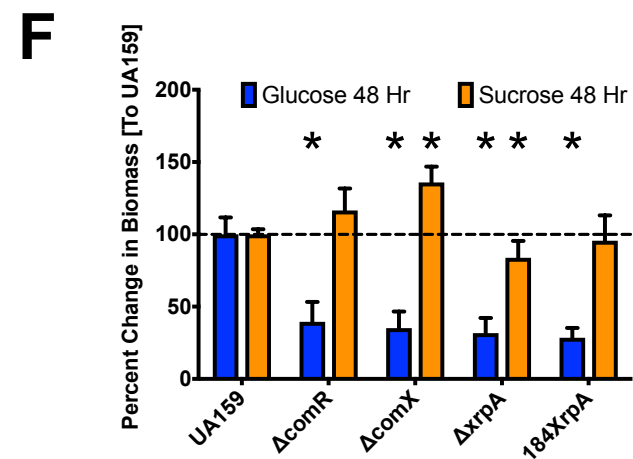

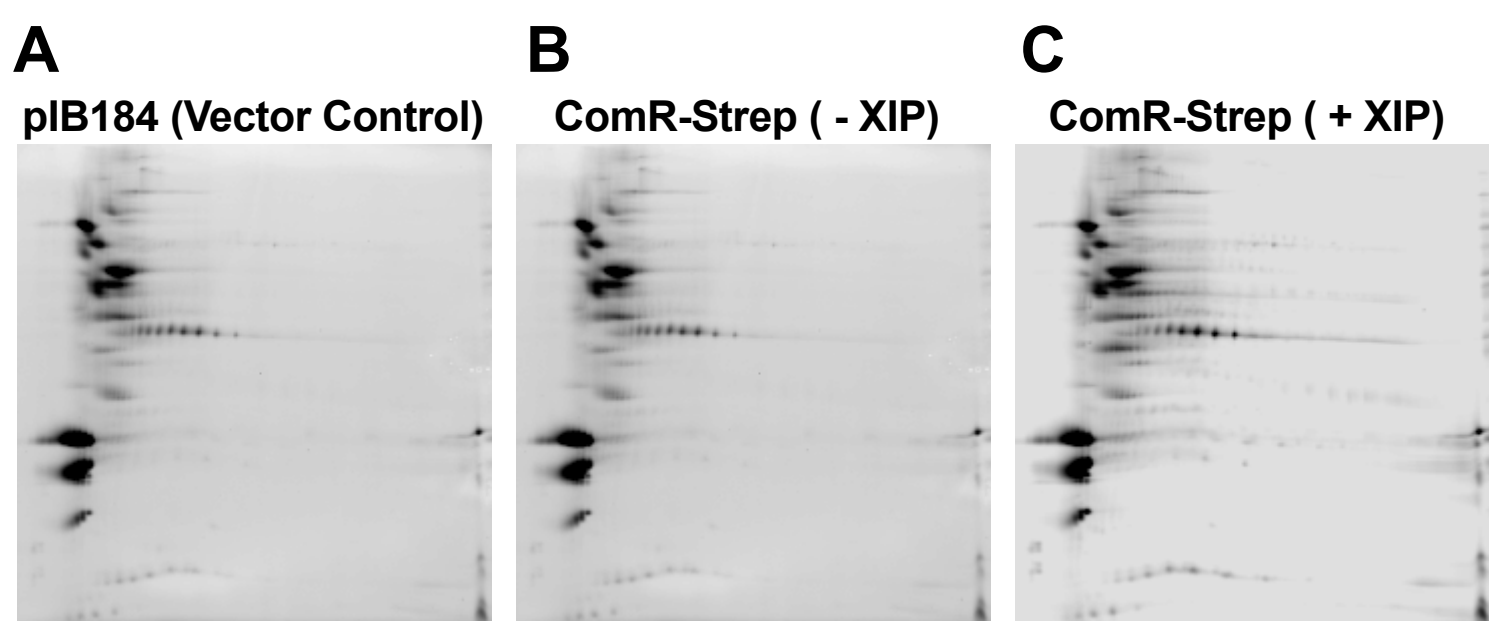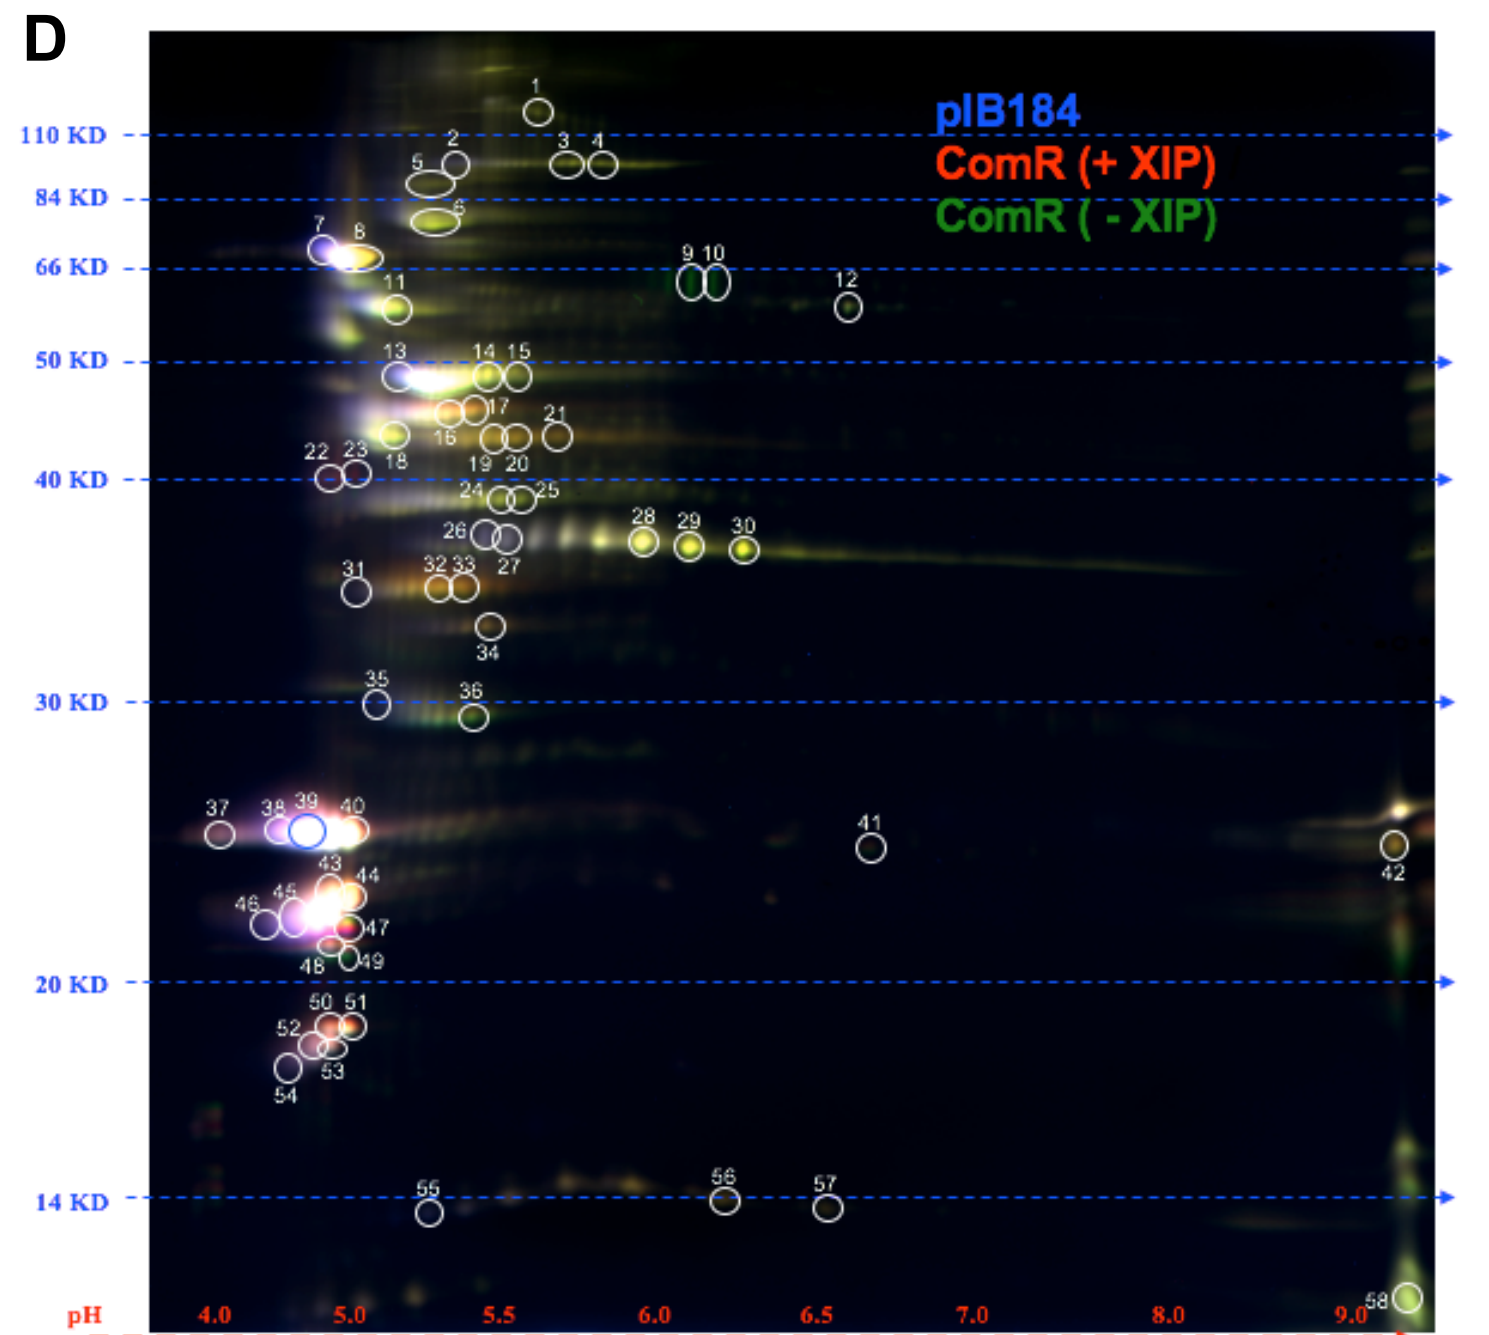

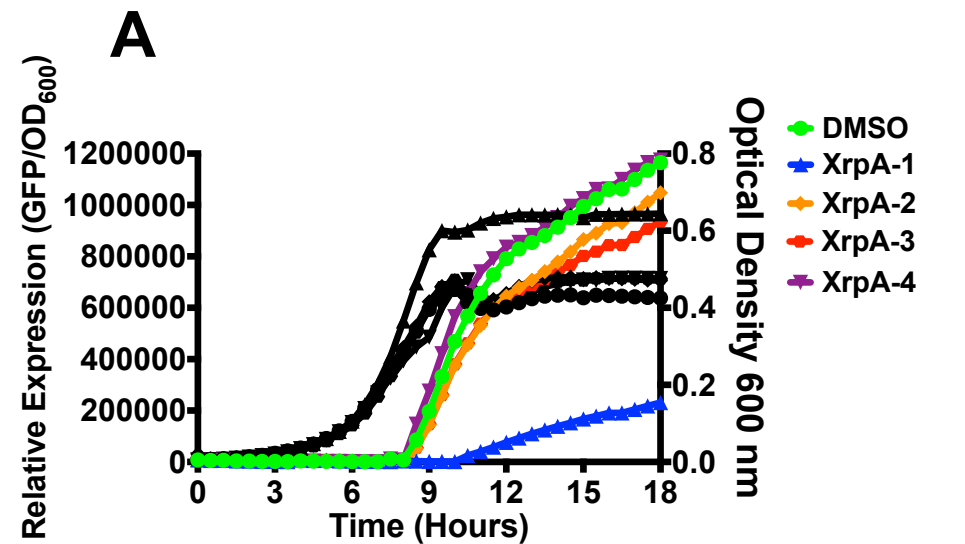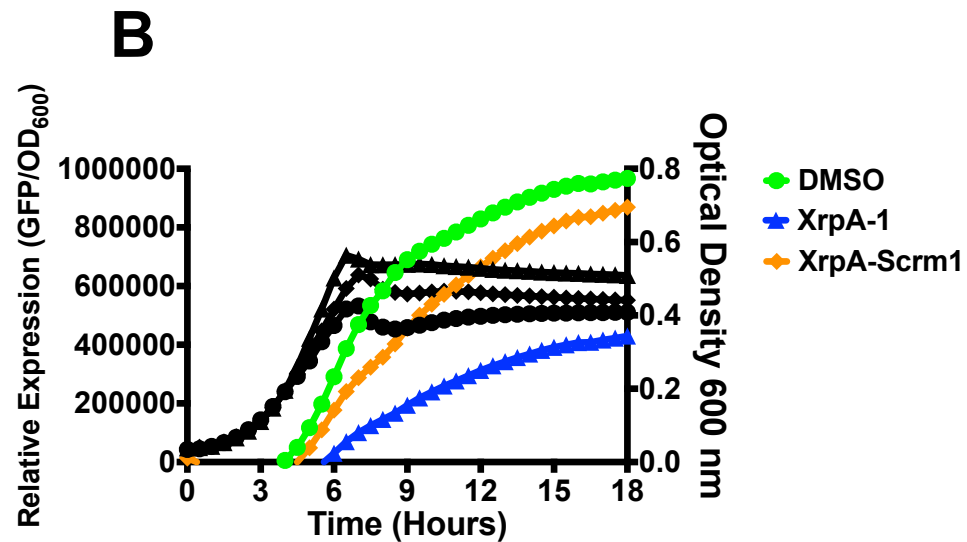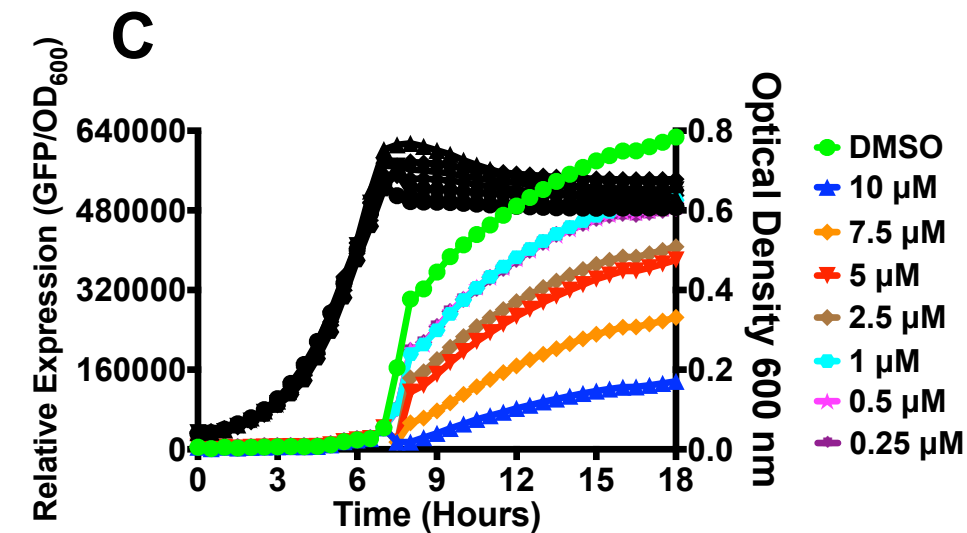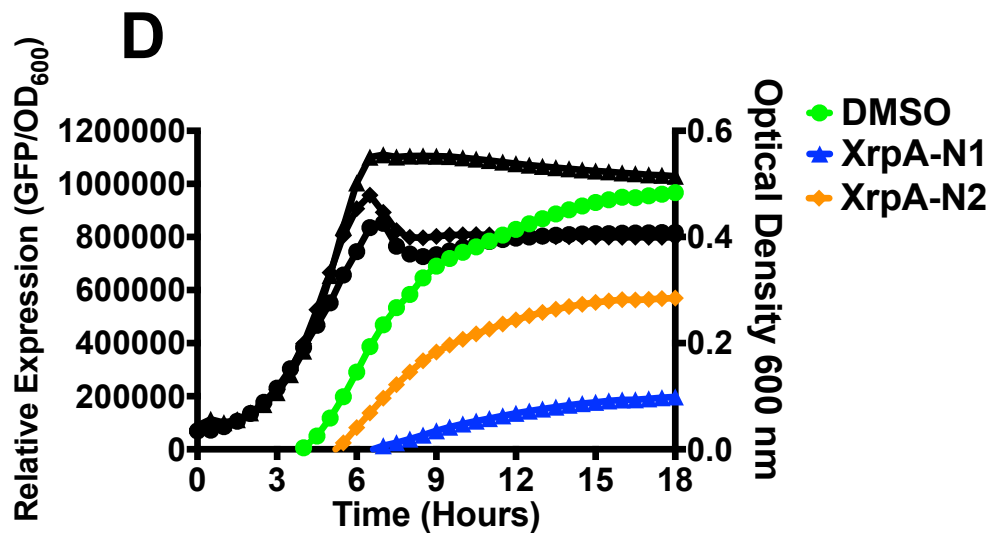



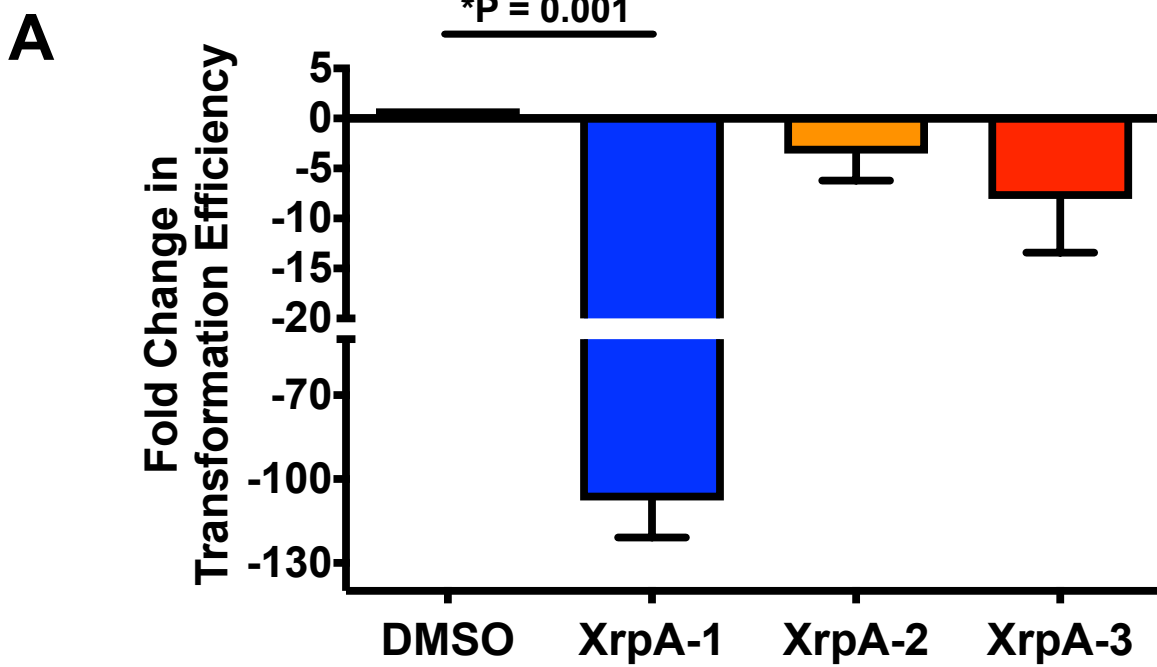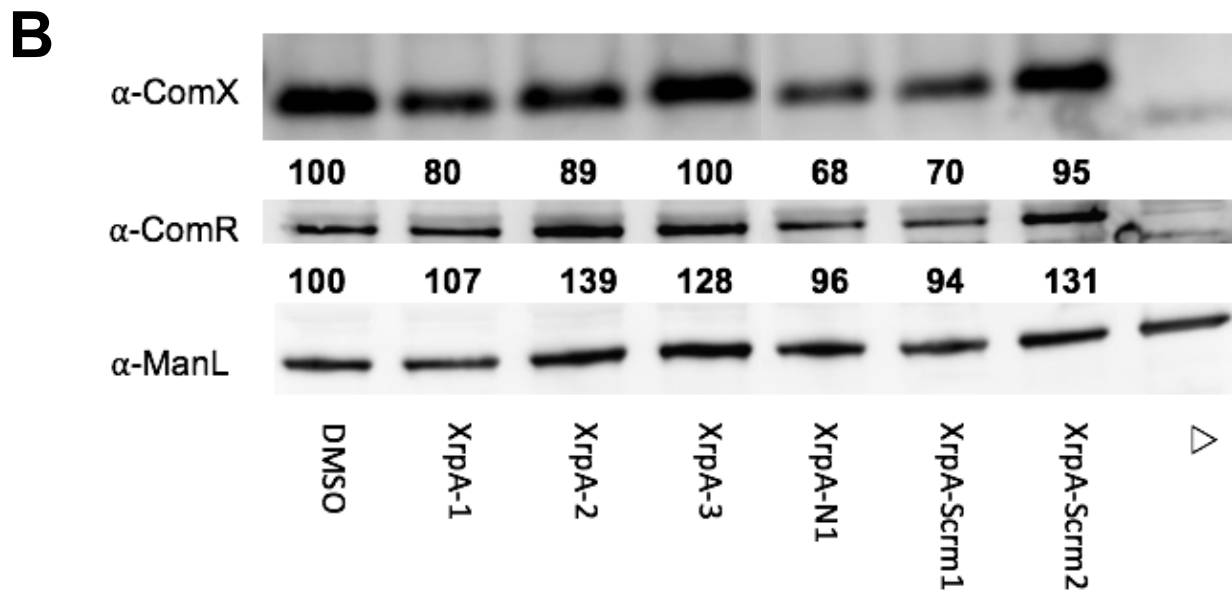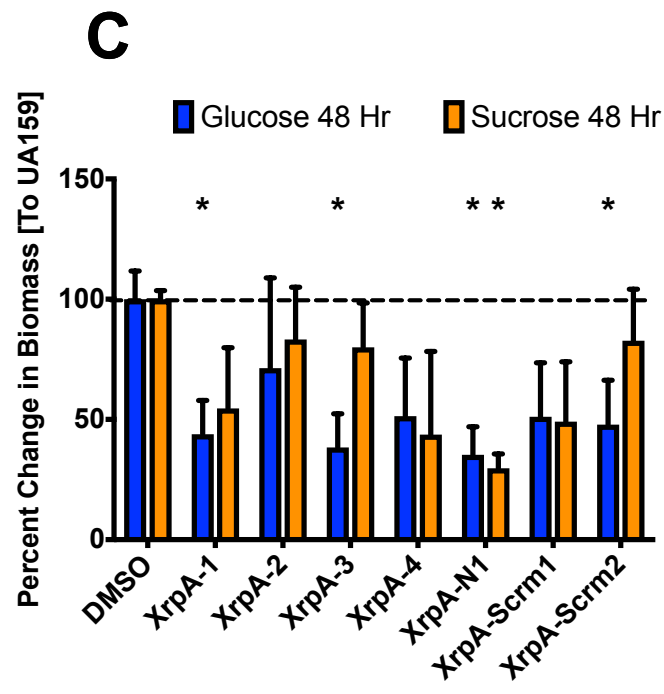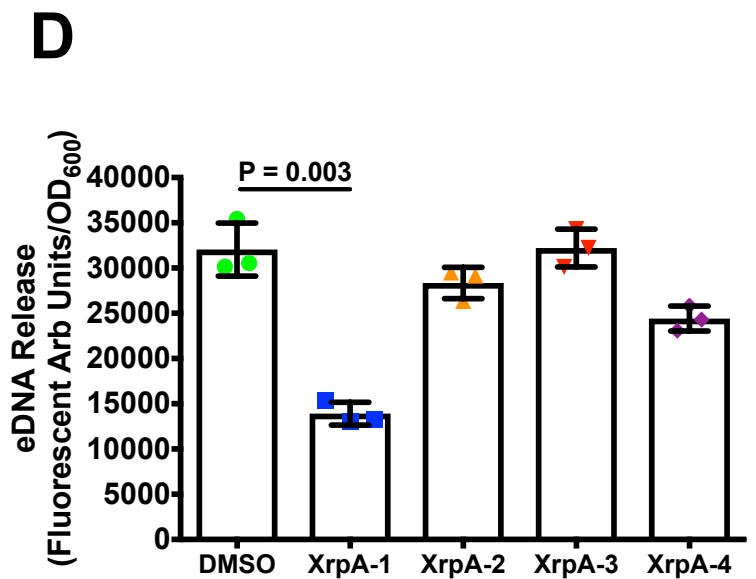

**A**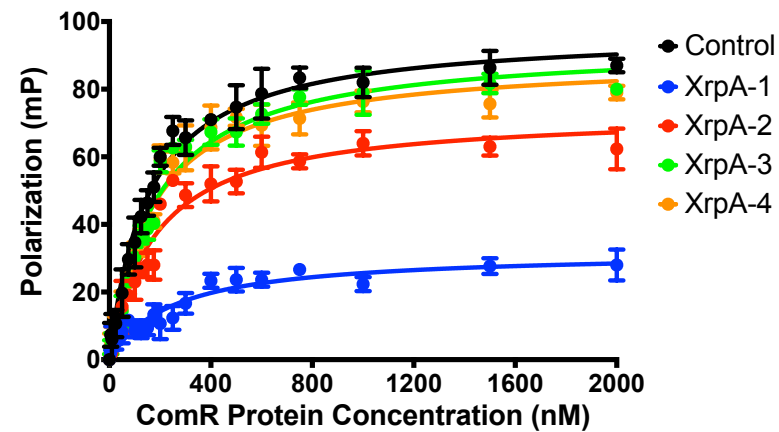**B**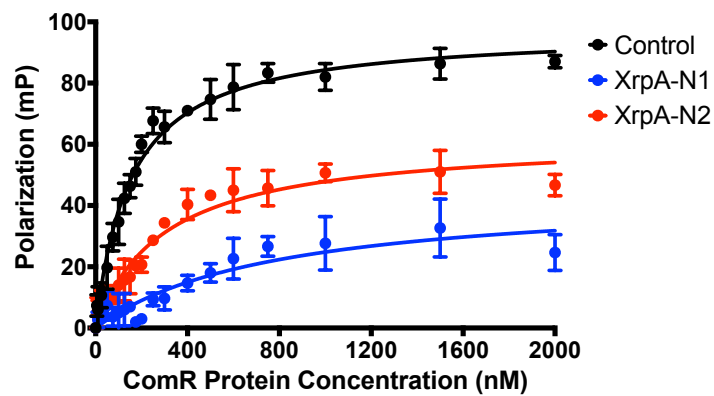**C**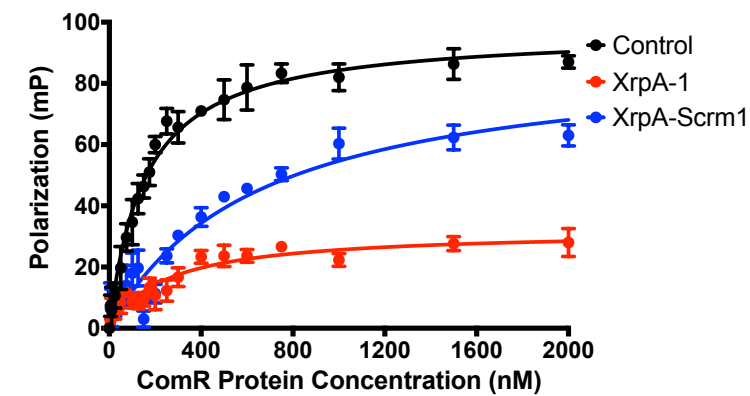**D**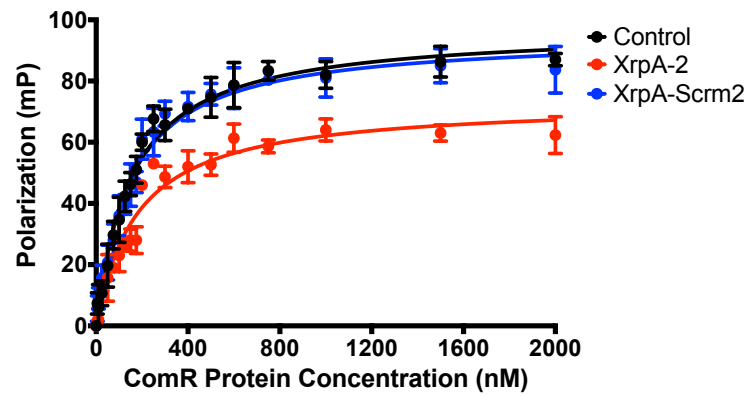**E**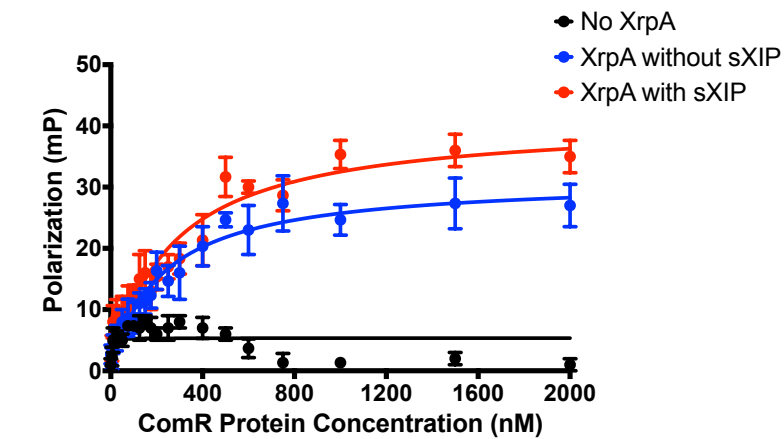**F**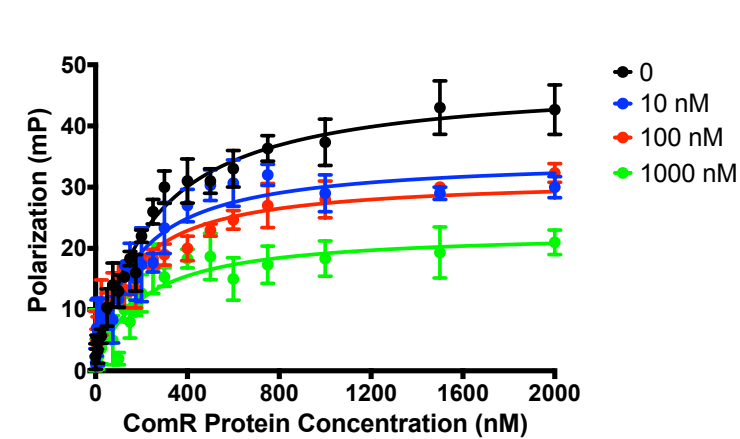

### UA159 (WT)

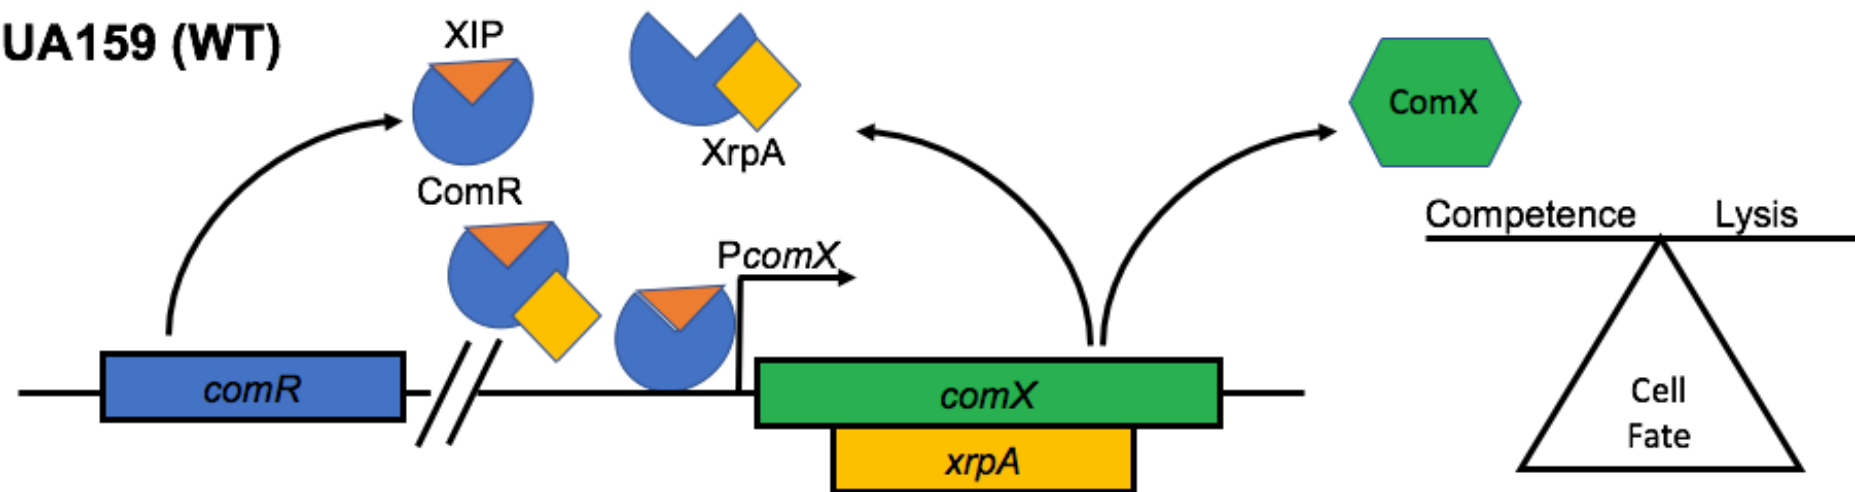

### $\Delta xrpA$ (*comX*::T162C)

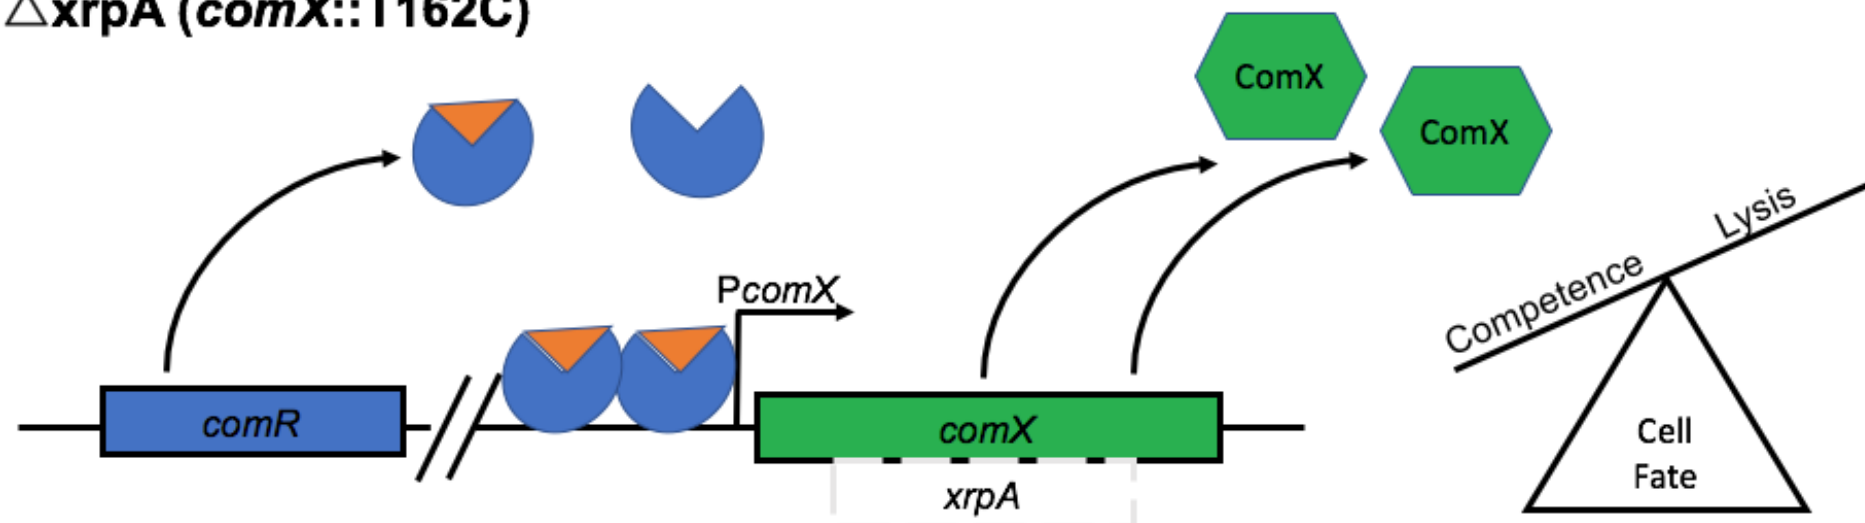

Source: https://www.biorxiv.org/content/10.1101/265223v1.full.pdf
